# Supplementary material for: Caso clínico de agresividad canina por conflicto social dirigida a miembros de la familia
Source: HighWire-hosted journal article supplement (doi:10.1136/gutjnl-2021-324109), 2009-01-01

**Supplemental Table 1.**

Demographics, clinicopathological, and operative characteristics of archived iCCA specimens included in immunohistochemical survival correlative analyses. Patients with perioperative mortality (within 30 days) were excluded from survival analysis.

**Supplemental Table 2.**

Demographics, clinicopathological, and treatment characteristics of patients with unresectable CCA treated at the University of Rochester Medical Center with complete blood counts included for peripheral monocyte and neutrophil to lymphocyte ratio analysis. Univariate and Multivariate Models constructed using the Cox Proportional Hazard method [risk ratio (95% Confidence interval)].

**Supplemental Table 3.**

Antibodies used for IHC, IHF, and flow cytometry analysis. IHC, immunohistochemistry; IHF, immunofluorescence; FC, flow cytometry.

**Supplemental Table 4**

Enrollment characteristics of spontaneous tumour bearing mice enrolled into therapeutic trial. P value determined by Mann-Whitney *U* or  $\chi^2$  test.

**Supplemental Table 5**

Differentially expressed protein coding genes (DEGs) from RNA-sequencing analysis of bone marrow derived macrophages educated with tumour supernatant. DEGs compare anti-GM-CSF and IgG control treated conditions. Genes filtered to include DEGs with  $\text{Log}_2(\text{Fold Change}) < -1.0$  or  $> 1.0$  and  $p < 0.05$ .

**Supplemental Table 6**

Pathway enrichment analysis of downregulated Gene Ontology Biological Processes from RNA-sequencing analysis of bone marrow derived macrophages educated with tumour supernatant. Pathways compare anti-GM-CSF and IgG control treated conditions. Gene sets were filtered based on  $p$  value  $< 0.05$  and  $\text{Log}_2(\text{Fold Change}) > 1.5$ .

**Supplemental Table 7**

Differentially expressed protein coding genes (DEGs) from RNA-sequencing analysis of URCCA4.3 treated tumours. DEGs compare anti-GM-CSF and IgG control treated conditions. Genes filtered to include DEGs with  $\text{Log}_2(\text{Fold Change}) < -1.0$  or  $> 1.0$  and  $p < 0.05$ .

**Supplemental Table 8**

Pathway enrichment analysis of downregulated Gene Ontology Biological Processes from RNA-sequencing analysis of URCCA4.3 treated tumours. Pathways compare anti-GM-CSF and IgG control treated conditions. Gene sets were filtered based on p value <0.05 and Log<sub>2</sub>(Fold Change) >1.5.

### Supplemental Table 9

Pathway enrichment analysis of upregulated Gene Ontology Biological Processes of bone marrow derived macrophages educated with tumour supernatant. Pathways compare anti-GM-CSF and IgG control treated conditions. Gene sets were filtered based on p value <0.05 and Log<sub>2</sub>(Fold Change) >1.5.

### Supplemental Table 10

Pathway enrichment analysis of upregulated Gene Ontology Biological Processes from RNA-sequencing analysis of URCCA4.3 treated tumours. Pathways compare anti-GM-CSF and IgG control treated conditions. Gene sets were filtered based on p value <0.05 and Log<sub>2</sub>(Fold Change) >1.5.

### Supplemental Figure 1.

**(A)** Representative normal liver and human intrahepatic cholangiocarcinoma (iCCA) immunohistochemistry (IHC) staining for CD68 and automated chromogen intensity markup with the Aperio Positive Pixel Count algorithm (V9). **(B)** Graphs compare the IHC staining intensities of CD68, CD15, and CD8 in tumour-adjacent liver tissue (n=29) versus normal liver parenchyma (n=15). **(C,D,E)** Graphs compare CD68, CD15, and CD8 IHC staining intensities within the normal liver parenchyma (C, n=15), margin of invasion (D, n=28), and tumour (E, n=35) of iCCA. **(F)** Kaplan-Meier survival analysis of patients with unresectable CCA after pre-screening CBC percent neutrophils and lymphocytes were stratified into cohorts with low (n=126) versus high (n=26) neutrophil to lymphocyte ratios (N:L). Arrows indicate median overall survival of patients with low versus high N:L. **(G)** CD15 IHC staining in tissue sections from surgically resected patient tumour specimens was digitally quantified and a Kaplan-Meier survival analysis was performed after patient tumour CD15 staining intensities were stratified into low (n=20) and high (n=10) cohorts. Arrows indicate median overall survival of patients with low versus high CD15 staining. Kaplan-Meier p values determined by log-rank test. **(H)** Kaplan-Meier analysis shows survival after CD8 IHC staining intensity in patient tissue sections was digitally quantified and stratified into low (n=20) versus high (n=10) staining cohorts. Arrows indicate median overall survival of patients following curative intent resection with low versus high CD8 staining. **(I)** Kaplan-Meier analysis shows survival after CD68 IHC staining intensity in patient tissue sections was stratified into low (n=8) versus high (n=23) staining cohorts. Arrows indicate median recurrence-free survival of patients following curative intent resection with low versus high CD68 staining. Patients with mortality within 30 days after surgery were excluded from any analyses using resectable tissue. All bar graphs depict means ± SEM and p values were determined by Mann-Whitney U test. ns = not significant, \* = p < 0.05, \*\* = p < 0.01, and \*\*\* = p < 0.001.

**Supplemental Figure 2.**

**(A,B)** Graphs compare patients' Model of End-Stage Liver Disease (MELD) score and pre-treatment monocyte (A, n=140) and neutrophil (B, n=140) to lymphocyte ratios (MLR and NLR respectively). Linear regression with 95% confidence interval overlaid in solid and dashed lines respectively. Correlation between parameters analysed utilising Spearman's  $\rho$ . **(C)** Heatmap shows Microenvironment Cell Population (MCP) counter analysis of human archival iCCA specimens from the URMCC cohort that yielded sufficient quality RNA for sequencing (n=12). **(D)** Heatmap shows hierarchical clustering analysis of 14 gene signatures derived from the MCP counter previously used to stratify human iCCA into immune subtypes.

**Supplemental Figure 3.**

**(A)** Representative flow cytometry plots show gating strategy for identifying inflammatory leukocytes and myeloid cells in normal livers of littermate controls and spontaneous iCCA tumours from KPPC mice. **(B)** Graph compares the prevalence of CD45+ inflammatory leukocytes by flow cytometry analysis in normal livers of littermate controls (n=13) versus those infiltrating iCCA tumours from KPPC mice (n=12). **(C)** Graph compares the prevalence of CD11b+ myeloid cells in normal livers of littermate controls (n=13) versus those infiltrating iCCA tumours from KPPC mice (n=12). **(D)** Heatmap shows murine MCP (mMCP) counter analysis of DEGs from established iCCA tumours (n=8) after bulk RNA sequencing was performed. **(E)** Graph shows qRT-PCR analysis of normalized mRNA expression for arginase 1 (*Arg1*) and mannose receptor (*Mrc1*) after bone marrow derived macrophages were cultured for 72 hours in standard media versus media conditioned by murine iCCA cell lines derived from different spontaneously occurring KPPC tumours (n=6 per cell line conditioned media). **(F,G,H)** Representative flow cytometry plots show gating strategies for T cells (F), Natural Killer Cells (G), and B cells (H) in established iCCA tumours from KPPC mice. Bars depict means  $\pm$  SEM and p values were determined by Mann-Whitney U test. \*\* = p<0.01 and \*\*\*\* = p < 0.0001.

**Supplemental Figure 4.**

**(A)** Representative B-mode image of new hepatic mass on surveillance; dashed line depicts maxial diameter; PV, Portal Vein; IVC, Inferior Vena Cava. **(B)** Representative B-mode with circumferential tracing of hepatic mass using Vevo LAB Software. **(C)** Day 0 3D wire-reconstruction of hepatic mass generated by automated interpolation between 2D circumferential tracings. **(D)** Day 27 3D wire-reconstruction.

**Supplemental Figure 5.**

**(A)** Schema depicting the generation of syngeneic cell lines from spontaneously occurring iCCA tumours. **(B)** Heatmap compares concentrations of secreted colony stimulating factors by various syngeneic murine University of Rochester Cholangiocarcinoma (URCCA) cell lines. The KP2 syngeneic cell line derived from a spontaneously occurring tumour from the KPPC mouse model of pancreatic cancer is included as a reference. ND, Not detected. **(C)** Representative images show H&E, CK7 IHC, trichrome, and CD45 IHC staining of tissue sections from normal murine

livers, an established spontaneous iCCA tumour from a congenic KPPC mouse, and an URCCA4.3 orthotopically injected tumour at Day 14. Images were acquired at 200X magnification.

### Supplemental Figure 6.

**(A)** Graph compares the prevalence of tumour-infiltrating G-MDSC by flow cytometry analysis after mice bearing established orthotopic URCCA4.3 tumours were treated with IgG control (n=7) or anti-GM-CSF (n=8) for 28 days. **(B)** Graph compares the prevalence of tumour-infiltrating myeloid cell subsets by flow cytometry analysis after mice bearing established orthotopic URCCA4.3 tumours were treated with IgG control (n=8) or anti-GM-CSF (n=8) for 14 days. **(C)** Representative flow cytometry plots demonstrate gating strategy for identifying dendritic cells in orthotopic URCCA4.3 tumours after treatment for 28 days as indicated. **(D)** Graph compares the prevalence of tumour-infiltrating dendritic cells by flow cytometry analysis after mice bearing established orthotopic URCCA4.3 tumours were treated with IgG control (n=7) or anti-GM-CSF (n=8) for 28 days. **(E)** Representative flow cytometry histogram of CD3<sup>+</sup> T cells from an orthotopic tumour sample show PD1 staining intensities in a fluorescence minus-one (FMO) control compared to positive sample. **(F)** Graph compares the prevalence of tumour-infiltrating CD4<sup>+</sup> T cells by flow cytometry analysis after mice bearing established orthotopic URCCA4.3 tumours were treated with IgG control (n=8) or anti-GM-CSF (n=8) for 14 days. **(G)** Graph compares the prevalence of tumour-infiltrating PD1<sup>+</sup> CD4<sup>+</sup> T cells by flow cytometry analysis after mice bearing established orthotopic URCCA4.3 tumours were treated with IgG control (n=8) or anti-GM-CSF (n=8) for 14 days. **(H)** Graph compares the prevalence of tumour-infiltrating CD8<sup>+</sup> T cells by flow cytometry analysis after mice bearing established orthotopic URCCA4.3 tumours were treated with IgG control (n=8) or anti-GM-CSF (n=8) for 14 days. **(I)** Representative flow cytometry plots demonstrate gating strategy for identifying T regulatory cells in orthotopic URCCA4.3 tumours after treatment for 14 days as indicated. **(J)** Graph compares the prevalence of tumour-infiltrating T regulatory cells after mice bearing established orthotopic URCCA4.3 tumours were treated with IgG control (n=8) or anti-GM-CSF (n=8) for 14 days. **(K)** Graph compares the prevalence of splenic myeloid cell subsets by flow cytometry analysis after mice bearing established orthotopic URCCA4.3 tumours were treated with IgG control (n=8) or anti-GM-CSF (n=8) for 14 days. **(L)** Kaplan-Meier analysis comparing survival of URCCA4.3 tumour-bearing mice treated with IgG control compared to mice depleted of CD4 and CD8 T cells (n=10 per group). p-value determined by log-rank test. All bar graphs depict means  $\pm$  SEM and p values determined by Mann-Whitney *U* test. ns =  $p > 0.05$ , \* =  $p < 0.05$ , \*\* =  $p < 0.01$ . G-MDSC, granulocytic myeloid derived suppressor cell; Mo-MDSC, monocytic myeloid derived suppressor cell; TAM, tumour associated macrophage; PD1, programmed cell death protein 1; CTLA-4, cytotoxic T-lymphocyte antigen 4.

### Supplemental Figure 7.

**(A)** Heatmap shows differentially expressed protein coding genes (DEGs) by RNA-seq of bone marrow-derived macrophages cultured in URCCA4.3 conditioned media with IgG control (n=6) or anti-GM-CSF neutralising antibody (n=6) for 72 hours. Results were filtered to include differentially expressed protein coding genes (DEGs) with  $\text{Log}_2(\text{Fold Change}) < -1.0$  or  $> 1.0$  and  $p < 0.05$ . **(B)** Graph shows qRT-PCR analysis of select downregulated DEGs determined by RNA-seq that are involved in M2 polarisation and immune modulation in orthotopic URCCA4.3 tumours



treated with IgG control (n=6) or anti-GM-CSF (n=5) for 14 days. **(C,D)** Ridgeplots show Molecular Signature Database Hallmark gene set enrichment analyses of DEGs determined by RNA-seq in bone marrow-derived tumour-educated macrophages (C) and URCCA4.3 tumours (D) after neutralisation of GM-CSF. **(E)** Representative Sirius Red images of URCCA4.3 tumours treated with IgG control or anti-GM-CSF for 28. Images taken at 200x magnification. **(F)** Graph compares the intensity of Sirius Red staining after established orthotopic URCCA4.3 tumours were treated with IgG control (n=7) or anti-GM-CSF (n=8) for 28 days. Sirius Red staining was digitally quantified using the Aperio Positive Pixel Count algorithm (V9). All bar graphs indicate means  $\pm$  SEM and p values determined by Mann-Whitney *U* test. \*\* =  $p < 0.01$ , # =  $p = 0.052$ , and ns = not significant.

| Characteristics              | Liver Invasive CCA (n=31) |
|------------------------------|---------------------------|
| <b>Age</b>                   | 48.1 (25.20)              |
| <b>Race</b>                  |                           |
| AA                           | 5 (16%)                   |
| Caucasian                    | 26 (84%)                  |
| <b>BMI</b>                   | 27 (3.98)                 |
| <b>Female Gender</b>         | 14 (45%)                  |
| <b>Etiology</b>              |                           |
| Sporadic                     | 25 (81%)                  |
| PSC                          | 3 (10%)                   |
| Hepatitis C Infection        | 1 (3%)                    |
| Wilson's Disease             | 1 (3%)                    |
| Cryptogenic Cirrhosis        | 2 (6%)                    |
| <b>Procedure</b>             |                           |
| Wedge Resection              | 1 (3%)                    |
| Sectionectomy                | 7 (23%)                   |
| Lobectomy                    | 13 (42%)                  |
| Trisectionectomy             | 5 (16%)                   |
| Transplantation              | 4 (13%)                   |
| <b>Adjuvant Chemotherapy</b> | 15 (48%)                  |
| <b>Margin Status</b>         |                           |
| R0                           | 27 (87%)                  |
| R1                           | 4 (10%)                   |
| R2                           | 1 (3%)                    |
| <b>T Stage</b>               |                           |
| T1                           | 11 (35%)                  |
| T2                           | 13 (41%)                  |
| T3                           | 5 (16%)                   |
| T4                           | 2 (6%)                    |
| <b>N Stage</b>               |                           |
| NX                           | 12 (39%)                  |
| N0                           | 11 (35%)                  |
| N1                           | 7 (23%)                   |
| N2                           | 1 (3%)                    |
| <b>LVI Present</b>           | 16 (52%)                  |
| <b>PNI Present</b>           | 12 (39%)                  |

BMI, body mass index; LVI, lymphovascular invasion; PNI, perineural invasion

| Unresectable CCA Characteristics (n: 140) | mean (SD); n (% of total) | Univariate Cox Proportional Hazard Model | Univariate p-Value | Multivariate Cox Proportional Hazard Model | Multivariate p-Value |
|-------------------------------------------|---------------------------|------------------------------------------|--------------------|--------------------------------------------|----------------------|
| <b>Age (years)</b>                        | 67.58 (11.84)             | 1.00 (0.98-1.02)                         | 0.63               |                                            |                      |
| <b>Race</b>                               |                           |                                          | 0.96               |                                            |                      |
| Caucasian                                 | 119 (89%)                 | reference                                |                    |                                            |                      |
| AA                                        | 13 (10%)                  | 1.08 (0.59-1.97)                         |                    |                                            |                      |
| Asian                                     | 1 (0.7%)                  | 0.94 (0.13-6.77)                         |                    |                                            |                      |
| Unknown/Not Disclosed                     | 7 (5%)                    | 1.01 (0.41-1.42)                         |                    |                                            |                      |
| <b>BMI</b>                                | 28.78 (5.83)              | 0.49 (0.14-1.80)                         | 0.28               |                                            |                      |
| <b>Gender</b>                             |                           |                                          | <b>0.44</b>        |                                            | 0.81                 |
| Female                                    | 67 (48%)                  | reference                                |                    | reference                                  |                      |
| Male                                      | 73 (52%)                  | 1.44 (1.01-2.05)                         |                    | 0.93 (0.81-0.53)                           |                      |
| <b>Anatomy of Lesion</b>                  |                           |                                          | 0.72               |                                            |                      |
| Liver Invasive CCA                        | 101 (72%)                 | reference                                |                    |                                            |                      |
| Perihilar CCA                             | 14 (10%)                  | 1.25 (0.70-2.25)                         |                    |                                            |                      |
| Extrahepatic CCA                          | 25 (18%)                  | 1.08 (0.68-1.74)                         |                    |                                            |                      |
| <b>Chemotherapy</b>                       |                           |                                          | <b>&lt;0.001</b>   |                                            | <b>0.003</b>         |
| Yes                                       | 78 (56%)                  | reference                                |                    | reference                                  |                      |
| No                                        | 62 (44%)                  | 2.10 (1.46-3.03)                         |                    | 2.47 (1.36-4.50)                           |                      |
| <b>Radiation Therapy</b>                  |                           |                                          | <b>&lt;0.001</b>   |                                            | <b>0.001</b>         |
| Yes                                       | 29 (21%)                  | reference                                |                    | reference                                  |                      |
| No                                        | 111 (79%)                 | 2.50 (1.58-3.96)                         |                    | 2.43 (1.39-4.28)                           |                      |
| <b>Neutrophil-Lymphocyte Ratio</b>        | 5.95 (6.11)               | 1.03 (1.01-1.06)                         | <b>0.01</b>        | 1.03 (0.98-1.07)                           | 0.24                 |
| <b>Monocyte-Lymphocyte Ratio</b>          | 0.62 (0.39)               | 2.01 (1.28-3.03)                         | <b>0.003</b>       | 0.84 (0.36-1.99)                           | 0.69                 |
| <b>Albumin</b>                            | 3.58 (0.60)               | 0.54 (0.41-0.72)                         | <b>&lt;0.001</b>   | 0.88 (0.52-1.50)                           | 0.64                 |
| <b>MELD</b>                               | 13.77 (7.9)               | 1.03 (1.01-1.06)                         | <b>&lt;0.001</b>   | 1.01 (0.97-1.06)                           | 0.64                 |
| <b>CA-19-9</b>                            | 16,374 (124,592)          | 1.00 (1.00-1.00)                         | 0.21               |                                            |                      |
| <b>ECOG Performance Status</b>            |                           |                                          | <b>&lt;0.001</b>   |                                            | <b>0.006</b>         |
| 0                                         | 20 (14%)                  | reference                                |                    | reference                                  |                      |
| 1                                         | 66 (47%)                  | 1.66 (0.96-2.88)                         |                    | 1.37 (0.66-2.86)                           |                      |
| 2                                         | 26 (19%)                  | 2.37 (1.28-4.43)                         |                    | 2.76 (1.23-6.21)                           |                      |
| 3                                         | 18 (13%)                  | 3.77 (1.88-7.59)                         |                    | 3.40 (1.23-9.36)                           |                      |
| 4                                         | 6 (4%)                    | 6.30 (2.44-16.3)                         |                    | 1.79 (0.35-9.15)                           |                      |
| Unknown/Not Disclosed                     | 4 (3%)                    | 3.30 (1.09-9.94)                         |                    |                                            |                      |
| <b>Contraindication to Resection</b>      |                           |                                          | 0.29               |                                            |                      |
| Locally Advanced                          | 67 (48%)                  | reference                                |                    |                                            |                      |
| Distant Metastases                        | 56 (40%)                  | 1.1 (0.75-1.61)                          |                    |                                            |                      |
| Comorbidities Preclude Surgery            | 17 (12%)                  | 0.74 (0.40-1.36)                         |                    |                                            |                      |

CCA, cholangiocarcinoma; AA, African American; BMI, body mass index; MELD, Model for End-Stage Liver Disease; ECOG, Eastern Cooperative Oncology Group

| Description              | Company                    | Host    | Clone       | Application | Dilution / Concentration |
|--------------------------|----------------------------|---------|-------------|-------------|--------------------------|
| Anti-human CD8           | ThermoFisher Scientific    | Mouse   | C8/144B     | IHC         | 1:100                    |
| Anti-human CD15          | Abcam                      | Mouse   | MY-1        | IHC         | 1:10                     |
| Anti-human CD45          | ThermoFisher Scientific    | Mouse   | AF114       | IHC         | 1ug/ml                   |
| Anti-human CD68          | Agilent Technologies, Inc. | Mouse   | PG-M1       | IHC         | 1:200                    |
| Anti-human Cytokeratin 7 | ThermoFisher Scientific    | Mouse   | OV-TL 12/30 | IHC         | 1:50                     |
| Anti-GM-CSF              | LifeSpan Biosceinces       | Rabbit  | polyclonal  | IHC         | 0.125ug/ml               |
| Anti-mouse CD45          | R&D Systems                | Goat    | polyclonal  | IHC         | 1:200                    |
| Anti-mouse Cytokeratin 7 | Abcam                      | Rabbit  | EPR17708    | IHC         | 1:8000                   |
| Anti-mouse F4/80         | ThermoFisher Scientific    | Rat     | Cl:A3-1     | IHF/FC      | 1:500/1:10               |
| Anti-mouse Ly6G          | Abcam                      | Rat     | RB6-8C5     | IHF         | 1:250                    |
| Anti-mouse MHCII         | Biolegend                  | Rat     | M5/114.15.2 | FC          | 1:200                    |
| Anti-mouse Ly6G          | Biolegend                  | Rat     | 1A8         | FC          | 1:40                     |
| Anti-mouse CD68          | Biolegend                  | Rat     | FA-11       | FC          | 1:40                     |
| Anti-mouse CD11c         | Biolegend                  | Rat     | N418        | FC          | 1:20                     |
| Anti-mouse ARG1          | ThermoFisher Scientific    | Rat     | A1exF5      | FC          | 1:333                    |
| Anti-mouse CD45          | Biolegend                  | Rat     | 30-F11      | FC          | 1:125                    |
| Anti-mouse Ly6C          | Biolegend                  | Rat     | HK1.4       | FC          | 1:200                    |
| Anti-mouse CD206         | Biolegend                  | Rat     | C068C2      | FC          | 1:100                    |
| Anti-mouse PD-L1         | Biolegend                  | Rat     | B7-H1       | FC          | 1:100                    |
| Anti-mouse CD3           | Biolegend                  | Hamster | 145-2C11    | FC          | 1:40                     |
| Anti-mouse CD8           | Biolegend                  | Rat     | 53-6.7      | FC          | 1:20                     |
| Anti-mouse CD49b         | Biolegend                  | Rat     | DX5         | FC          | 1:50                     |
| Anti-mouse CD19          | Biolegend                  | Rat     | 6D5         | FC          | 1:40                     |
| Anti-mouse FoxP3         | ThermoFisher Scientific    | Rat     | FJK-16S     | FC          | 1:20                     |
| Anti-mouse CD4           | SouthernBiotech            | Rat     | GK1.5       | FC          | 1:50                     |
| Anti-mouse CTLA-4        | Biolegend                  | Hamster | UC10-4B9    | FC          | 1:200                    |
| Anti-mouse PD-1          | Biolegend                  | Rat     | RMP1-30     | FC          | 1:20                     |

| Characteristics                        | IgG (n=12)    | $\alpha$ GM-CSF (n=12) | Statistic |
|----------------------------------------|---------------|------------------------|-----------|
| Age at Diagnosis (days)                | 98 (13.6)     | 108 (31.4)             | p=0.62    |
| Primary Lesion Size (mm <sup>3</sup> ) | 19.69 (21.55) | 36.33 (22.45)          | p=0.51    |
| Female Gender                          | 7 (58%)       | 8 (67%)                | p=0.18    |
| Anatomy of Lesion                      |               |                        | p=0.77    |
| Right Lobes                            | 3 (25%)       | 3 (25%)                |           |
| Left Lobes                             | 4 (33%)       | 5 (42%)                |           |
| Middle Lobes                           | 4 (33%)       | 4 (33%)                |           |
| Caudate Lobe                           | 1 (8%)        | 0 (0%)                 |           |

IgG, Isotype antibody;  $\alpha$ GM-CSF, anti-granulocyte-macrophage colony stimulating factor

| Gene_Name | log2FoldChange | padj                  |
|-----------|----------------|-----------------------|
| Rnase2a   | -11.91902539   | 4.33940042936117e-09  |
| Retnla    | -11.55843871   | 1.56849535902227e-08  |
| Car4      | -9.235107876   | 2.63871804673317e-05  |
| Cd209e    | -8.177390115   | 0.00192021851657735   |
| Erv3      | -8.099006483   | 0.0685545459437713    |
| Mucl1     | -7.90039617    | 0.00227461895919434   |
| Arhgap8   | -7.898652382   | 0.00169576075553321   |
| Rnase12   | -7.320123298   | 0.0187023178840156    |
| Ccl17     | -7.307823984   | 7.51550269184774e-14  |
| Scn2b     | -7.20494255    | 0.0147709568638463    |
| Il33      | -7.14854781    | 0.0254568506562393    |
| Tmem215   | -7.086173142   | 0.0222639240584773    |
| Gja5      | -7.01619882    | 0.0190997773213805    |
| Sectm1a   | -6.993255899   | 0.0525929856769819    |
| Dgkk      | -6.949901451   | 0.0220179352356764    |
| Tnni3k    | -6.941991659   | 0.0558089319415464    |
| Aurkc     | -6.938095005   | 0.0396494515423916    |
| Usp51     | -6.80492585    | 0.0438298723976394    |
| Klk15     | -6.750967467   | 0.0480622041577349    |
| Klk8      | -6.740260253   | 0.0524224971334394    |
| Klk1b9    | -6.712776203   | 0.0764523797981786    |
| Alox12e   | -6.605935885   | 0.0874163493075054    |
| Rec8      | -6.60423054    | 0.0580516374391761    |
| Pla2g4f   | -6.336973375   | 0.0845877094781539    |
| Clec2l    | -6.319032013   | 0.0915561557603499    |
| Cd209d    | -6.268941555   | 8.66368944654856e-16  |
| B3galt2   | -6.137603963   | 9.26679405949091e-08  |
| Gstp3     | -6.136709848   | 0.107481732621753     |
| Gm8773    | -6.08751868    | 0.115548663183879     |
| Amigo2    | -5.978899641   | 2.01363906497947e-24  |
| Epx       | -5.776794773   | 8.37327358089653e-12  |
| Rasgrp1   | -5.750791939   | 7.62527241017549e-59  |
| Prex2     | -5.700705156   | 0.0675486965155445    |
| Ms4a8a    | -5.625185439   | 3.33550653144175e-35  |
| Sorcs2    | -5.614510626   | 0.0494787181712617    |
| Anxa8     | -5.577317592   | 0.0201846091068261    |
| Ptx3      | -5.57343324    | 4.4200599300715e-11   |
| Bex6      | -5.527920831   | 0.0495342576921568    |
| Sctr      | -5.484426362   | 0.057176204243387     |
| Tmem53    | -5.252669515   | 1.32995734421683e-36  |
| Plet1     | -5.185583458   | 2.20151812322795e-18  |
| Serpina3k | -5.166060141   | 0.0976811604186687    |
| Spint1    | -5.117696659   | 2.93178871067809e-25  |
| Pdcd1lg2  | -5.050965347   | 3.58560330775534e-23  |
| Vdr       | -4.970669613   | 2.57261805560685e-205 |
| Scel      | -4.932329939   | 6.90233471057653e-35  |



|               |                                    |
|---------------|------------------------------------|
| F830016B08Rik | -4.884359362 9.4385337999758e-11   |
| C4bp          | -4.857374194 0.134169215203617     |
| Ear6          | -4.834467449 5.82834880652627e-38  |
| Slc6a2        | -4.83278422 0.114892698219194      |
| Serpina3f     | -4.785215645 0.0491351431118607    |
| Amer3         | -4.781597785 0.0339482159624562    |
| Arg1          | -4.679291883 0                     |
| Ccl22         | -4.653655112 3.49194642625976e-293 |
| Cdh1          | -4.615845536 2.04156383615218e-33  |
| Cd6           | -4.587024556 0.0419846335662644    |
| Cldn23        | -4.578143691 0.0489331946682712    |
| Il6           | -4.522847427 0.0224916774743408    |
| Cish          | -4.466623836 5.89839348378348e-272 |
| Snai3         | -4.410243448 0.0336361653230272    |
| Ffar4         | -4.388802418 1.93525490227073e-12  |
| Nrg1          | -4.325226461 6.3795232981444e-51   |
| Bcl2a1a       | -4.30428555 7.06911901494561e-196  |
| Slc36a2       | -4.273431223 3.93261514695602e-177 |
| Cxcl3         | -4.244074807 2.10073689152744e-66  |
| Olr1          | -4.203328218 1.17002402766918e-20  |
| Gpr62         | -4.177610504 0.00278337538759358   |
| Socs2         | -4.109816001 0                     |
| Adgrg5        | -4.094696484 0.0732171067788978    |
| Ccl6          | -4.064476881 0                     |
| Kcnn3         | -4.024352342 1.77367225111943e-14  |
| Gipc3         | -4.019279357 0.0809874786543211    |
| Ly6i          | -4.015597252 1.23122464107412e-46  |
| Klk1b1        | -3.949919232 1.01389654190453e-53  |
| Clec9a        | -3.919364819 2.06041451987176e-13  |
| Klk1b11       | -3.887398034 9.60419665253426e-73  |
| Dazl          | -3.87633086 0.0447696298151836     |
| Gbp4          | -3.86216896 2.33642063336309e-19   |
| 1700061G19Rik | -3.860747127 2.38995386137579e-07  |
| Slc6a12       | -3.857773511 7.33242614343355e-30  |
| Cfb           | -3.839618024 0.0680037154816396    |
| Dlx4          | -3.808124471 0.07862457695056      |
| Nnmt          | -3.7835591 9.55767581736006e-11    |
| Esyt3         | -3.771458904 0.00161062890516574   |
| Ear1          | -3.729635323 1.6066706694474e-31   |
| Ankrd63       | -3.658275381 0.0667842426308048    |
| Irgc1         | -3.641367519 3.8063122185952e-07   |
| Slc6a4        | -3.628836831 0.0187137419118895    |
| Vcan          | -3.627841728 1.39223430955216e-47  |
| Rcvrn         | -3.609786621 0.0547207268605245    |
| Mmp8          | -3.609271344 0                     |
| Klrk1         | -3.605939005 1.2773048609292e-06   |
| Mgl2          | -3.57609818 6.10371808763335e-227  |

|               |              |                       |
|---------------|--------------|-----------------------|
| Elovl7        | -3.547730809 | 9.52229914981648e-39  |
| Col24a1       | -3.540694786 | 2.04458356112501e-07  |
| Fst           | -3.532113184 | 2.04111789252884e-05  |
| Itgam         | -3.505694376 | 0.000287812979153863  |
| Cyp2ab1       | -3.500739181 | 4.79496605626862e-12  |
| Cd209c        | -3.493214498 | 5.81899014439122e-06  |
| Tlr11         | -3.485204808 | 0.000666178331618547  |
| Hr            | -3.479688965 | 6.79864458214429e-23  |
| Hal           | -3.47417841  | 5.09057676951415e-23  |
| Gpr171        | -3.453668992 | 1.80047271915936e-142 |
| Il1rl2        | -3.443430961 | 1.24976060713477e-217 |
| Selp          | -3.425184788 | 3.53451513848712e-09  |
| Cd200r3       | -3.424620097 | 2.46163950361111e-07  |
| Cp            | -3.417278315 | 7.85193187089802e-127 |
| Plekha6       | -3.416012498 | 1.06271439222856e-06  |
| Gm4951        | -3.405084589 | 8.27771044687658e-41  |
| Tnfsf8        | -3.403988805 | 1.3122854225108e-18   |
| Il23a         | -3.373209733 | 0.0916860201854412    |
| Fn1           | -3.359435291 | 0                     |
| Spry1         | -3.307459655 | 9.02329007007894e-36  |
| Aplnr         | -3.257477839 | 0.000717824108403965  |
| Prg2          | -3.252757507 | 1.01187202442092e-35  |
| Tnn           | -3.242753299 | 0.126945384212517     |
| Tdrd12        | -3.22364902  | 0.146884751250143     |
| Lmo1          | -3.220233651 | 0.0132175959247064    |
| Kazn          | -3.219970979 | 2.007612059095e-06    |
| Acpp          | -3.21900827  | 3.30803084068909e-42  |
| Ear2          | -3.217685585 | 1.50923156280939e-145 |
| Nr4a3         | -3.214285901 | 2.29406081887836e-05  |
| Itga1         | -3.214102565 | 7.88455515243311e-66  |
| Cd226         | -3.194134837 | 0.06751063163916      |
| Gbp8          | -3.171526909 | 4.411886499963e-86    |
| P2rx5         | -3.156549896 | 0.000132438340139897  |
| Bcl2a1d       | -3.127231262 | 1.28611869057191e-206 |
| Adra2a        | -3.120641539 | 0.000483718229901936  |
| Flrt3         | -3.112332147 | 3.81987900144996e-19  |
| Myh3          | -3.104399458 | 0.0568639470289187    |
| Gbp6          | -3.098832278 | 2.28080878425741e-07  |
| Tnfrsf9       | -3.088961005 | 1.0883628599905e-06   |
| Bcas1         | -3.060309896 | 8.59681578541405e-05  |
| Hs3st3b1      | -3.050772067 | 3.971433717537e-35    |
| A930004D18Rik | -3.031680254 | 0.00344508953688608   |
| Unc93a        | -3.011396206 | 0.136312539970402     |
| Slc52a3       | -2.963943863 | 5.4894071801513e-05   |
| Edn1          | -2.96304721  | 2.71280666928235e-05  |
| Mt3           | -2.955149939 | 0.0109731245957073    |
| Lmod3         | -2.953409174 | 1.55970219423539e-05  |

|               |                                    |
|---------------|------------------------------------|
| Scn4b         | -2.9523195 0.13251377351719        |
| Camk2n1       | -2.935755755 6.94450677119983e-29  |
| Syt7          | -2.933210109 0.0148527487707251    |
| Plxdc2        | -2.927726181 6.12744732042528e-264 |
| Shcbp1l       | -2.922924289 1.89063565365583e-09  |
| Siglec5       | -2.892533832 2.10038346304674e-61  |
| Fkbp11        | -2.862838431 4.90328089049186e-18  |
| Ppef2         | -2.849626607 0.00854650184230444   |
| F10           | -2.848176446 0                     |
| Rnase2b       | -2.816901214 0.000243211764374117  |
| F3            | -2.783703813 6.84649137776239e-31  |
| C530008M17Rik | -2.757843153 0.0976300604181752    |
| Scimp         | -2.753267399 1.64696772273528e-15  |
| Enkur         | -2.748626587 0.0994752530558749    |
| Sphk1         | -2.744615879 2.76765739126936e-44  |
| Htra4         | -2.735582105 1.57814302141496e-10  |
| Myom3         | -2.724404914 0.0123160200496858    |
| Epha4         | -2.716883266 1.93212278005152e-05  |
| Smim5         | -2.715510524 4.33883080685683e-07  |
| Bst1          | -2.697861376 1.43632045594473e-252 |
| Flywch2       | -2.681518517 1.00425875045555e-11  |
| Rbp4          | -2.679001203 0.10202527385147      |
| Perp          | -2.671108812 0.145028599465817     |
| Wfdc17        | -2.661261314 5.32486892239272e-219 |
| Il1a          | -2.649950584 7.69449159639476e-43  |
| Prg3          | -2.636725549 1.89196486161873e-06  |
| Awat1         | -2.635280882 5.75819654833333e-06  |
| Lipg          | -2.622215441 0.000177514467815955  |
| Mmp13         | -2.614404312 2.8582038333948e-125  |
| Ppm1n         | -2.611529386 0.004848289950975     |
| Gda           | -2.594730117 5.2628657041444e-287  |
| Rarb          | -2.557700542 0.04134731935206      |
| Lgi3          | -2.546936795 0.043682297231297     |
| Myrf          | -2.508352979 1.80269732951609e-54  |
| Fam167a       | -2.495378614 0.000144550147226181  |
| Ass1          | -2.491971557 9.23087441183145e-20  |
| Alpk2         | -2.491032201 0.132030946344443     |
| Gpr55         | -2.489875549 4.36509488196928e-09  |
| Il1b          | -2.478539146 8.94439885075042e-88  |
| Gabbr1        | -2.473498309 2.74591388805922e-26  |
| Gbp5          | -2.449141398 2.22009327343965e-43  |
| Gfi1b         | -2.435514267 0.0494642866519847    |
| Hcar2         | -2.421484247 4.32501753936787e-37  |
| Alox15        | -2.414603894 6.26485319739234e-05  |
| Irf4          | -2.40745115 1.50095410201531e-43   |
| Src           | -2.396307311 6.24679384150486e-93  |
| AA467197      | -2.394730614 2.20253945870744e-46  |

|               |              |                       |
|---------------|--------------|-----------------------|
| Nabp1         | -2.366492499 | 1.23796701497059e-214 |
| Hp            | -2.36318503  | 5.90578785150129e-119 |
| Naaa          | -2.356375543 | 3.97171245207693e-140 |
| Slpi          | -2.353995264 | 6.95782087670276e-54  |
| Tnfsf14       | -2.329650957 | 4.219171237286e-59    |
| Gbp9          | -2.329625998 | 3.07855572092127e-166 |
| Asb11         | -2.327499007 | 0.118231916292449     |
| Fam124a       | -2.321234389 | 0.00560587726798844   |
| Hepacam2      | -2.312840963 | 0.0370001434181501    |
| Met           | -2.306966183 | 3.27813663474022e-74  |
| Wfdc18        | -2.287375639 | 6.9257095108747e-10   |
| Pgpep1l       | -2.286193262 | 0.00182709843320909   |
| Serpinf2      | -2.282640635 | 0.13967991694284      |
| Rras2         | -2.26676747  | 1.28868887255323e-54  |
| Art2b         | -2.265134225 | 0.0113773457061184    |
| Stum          | -2.262004357 | 0.00456613818037809   |
| Sec16b        | -2.259782385 | 0.00961872184962678   |
| Foxq1         | -2.257631218 | 1.63123912757607e-05  |
| Plcb1         | -2.233979138 | 1.0861786817367e-24   |
| C3            | -2.231007385 | 4.81365635923769e-156 |
| Ttll11        | -2.225081244 | 2.40861574933727e-05  |
| Prkca         | -2.219818476 | 1.30289383176294e-41  |
| Ccl9          | -2.216081729 | 1.90068999592808e-197 |
| Dok7          | -2.212587899 | 0.000216040231026891  |
| Slc7a2        | -2.208430062 | 2.25640794768151e-136 |
| Tnfrsf18      | -2.203439239 | 2.01262374634685e-05  |
| Dennd3        | -2.194389582 | 2.19953491133269e-22  |
| Mcf2l         | -2.185972914 | 1.41746475473501e-147 |
| Tg            | -2.182332295 | 0.0459946341333623    |
| Pdlim1        | -2.175275355 | 2.94431324246486e-09  |
| Gm10647       | -2.171578265 | 0.147291411061572     |
| Ntn4          | -2.168815211 | 0.000880596079085729  |
| Aldh1a2       | -2.157111781 | 0.00152989051375884   |
| Cxcl2         | -2.154888877 | 2.24287530120291e-69  |
| F7            | -2.150489217 | 3.69546421251584e-177 |
| Cideb         | -2.141826244 | 4.74896082944384e-05  |
| Casp12        | -2.140484564 | 0.00110143479520273   |
| Ccdc80        | -2.124158658 | 4.38209975088924e-10  |
| Clu           | -2.11608569  | 0.00610214705820626   |
| Csf1          | -2.113148921 | 2.55457069446811e-89  |
| Saa3          | -2.09462408  | 1.19276162878593e-17  |
| G430095P16Rik | -2.088013051 | 7.40155810533465e-06  |
| Clmn          | -2.082869115 | 1.70747857529931e-07  |
| Tcp10b        | -2.077822727 | 0.000136338788358908  |
| Cd300lf       | -2.076553659 | 5.0176887037989e-102  |
| Tmem151a      | -2.066378556 | 0.00724310966972291   |
| Trim72        | -2.066173107 | 0.100513204635534     |

|           |              |                       |
|-----------|--------------|-----------------------|
| Cxcl1     | -2.062570689 | 0.0719302226678945    |
| Prr15     | -2.062246153 | 2.14361836709435e-11  |
| Ak8       | -2.058782166 | 5.56068513426948e-53  |
| Kynu      | -2.0576942   | 8.79869437898483e-17  |
| Uck2      | -2.050949949 | 2.5081778041647e-146  |
| Cables1   | -2.050213265 | 8.70650776204239e-41  |
| Mmp12     | -2.046669701 | 1.93854774121842e-140 |
| Ttpa      | -2.032936072 | 0.0771362598556111    |
| Cited4    | -2.024100367 | 0.129045777242197     |
| Adgre4    | -2.023600159 | 2.09747247004688e-38  |
| Il1r2     | -2.023351693 | 2.27997283344048e-11  |
| Cd209a    | -2.012332994 | 8.19747141596601e-10  |
| Acy1      | -2.012262669 | 9.07346471951128e-31  |
| Mmp19     | -2.011402902 | 5.84605710681904e-192 |
| Serpina3g | -2.004293876 | 0.00835928726818797   |
| Gbp7      | -2.001910011 | 1.46806189626231e-60  |
| Aqp9      | -1.985850124 | 1.35356652944257e-22  |
| Gm8113    | -1.98250593  | 1.46505222147566e-07  |
| Penk      | -1.982221293 | 8.31283319113669e-20  |
| Gpld1     | -1.976873774 | 0.146587257282198     |
| Slc39a2   | -1.973771009 | 1.39448349326872e-06  |
| Fam169b   | -1.973422418 | 0.00571009774741618   |
| Ly75      | -1.966796314 | 5.99982699767965e-13  |
| Klf4      | -1.963601088 | 1.97901390935868e-63  |
| Cyp26b1   | -1.96335902  | 0.0699022637419263    |
| Mcemp1    | -1.963290906 | 6.21923011636299e-48  |
| St7       | -1.962799643 | 6.68226202181405e-60  |
| Fpr2      | -1.962789664 | 4.19691595688791e-44  |
| Egr2      | -1.962743863 | 2.63664473644494e-176 |
| C1s1      | -1.947068136 | 0.0507971225362328    |
| Gm9733    | -1.941848661 | 1.09240850359408e-06  |
| Eps8      | -1.939203114 | 3.63732973877509e-164 |
| Fcor      | -1.938948562 | 1.3122854225108e-18   |
| Upp1      | -1.931106483 | 8.32499322286385e-06  |
| Grik4     | -1.930934077 | 0.00643779585222298   |
| P2ry14    | -1.917811261 | 6.08081254593735e-86  |
| Cd274     | -1.913376619 | 1.76515040988177e-235 |
| Atp10a    | -1.912949693 | 6.24682536403442e-34  |
| Akap7     | -1.903675236 | 1.85440752716212e-70  |
| Fpr1      | -1.9034198   | 3.12891611422805e-35  |
| Slc18a1   | -1.899378595 | 1.1294313787519e-10   |
| Relt      | -1.898840424 | 8.77970481319459e-47  |
| Fxyd7     | -1.892152041 | 0.0784118840764761    |
| Ltb4r1    | -1.877644221 | 6.13013465455406e-11  |
| Clec1b    | -1.866103878 | 1.48829714335129e-10  |
| Prss30    | -1.863908604 | 0.0442186286104118    |
| Mreg      | -1.862234307 | 1.46516435212882e-08  |

|               |              |                       |
|---------------|--------------|-----------------------|
| Ccr7          | -1.860322713 | 3.28359916191615e-10  |
| Cd300lg       | -1.859512798 | 2.59843393074909e-07  |
| Slc9a3r2      | -1.85943168  | 0.000409969080297645  |
| Fcrlb         | -1.855418984 | 0.0252441781590998    |
| Gpr15         | -1.843607934 | 0.0223966011522116    |
| Ryr1          | -1.842438086 | 6.55927089993458e-09  |
| F5            | -1.841836743 | 2.59166657402295e-12  |
| St8sia6       | -1.841254729 | 0.0029777785264091    |
| Ly6c2         | -1.838934998 | 5.90848082746351e-24  |
| Tfec          | -1.831994535 | 2.20751443868685e-100 |
| Naip1         | -1.785076771 | 2.94093246677589e-14  |
| Gpr68         | -1.773163876 | 6.57234485367744e-18  |
| Klrg2         | -1.768866169 | 0.0484357977769958    |
| Gvin1         | -1.767386191 | 4.68623731866355e-13  |
| Gm4070        | -1.763738823 | 4.06959604618291e-20  |
| Tma16         | -1.762978694 | 1.62169284303411e-71  |
| Tnfsf15       | -1.762218214 | 0.00470301434259451   |
| Slfn1         | -1.760092995 | 3.48193446676506e-18  |
| Gpr141        | -1.750464453 | 7.80060301318615e-59  |
| Ocstamp       | -1.735335508 | 1.63144758146274e-07  |
| Spns2         | -1.729813856 | 0.0137389787615224    |
| 9130230L23Rik | -1.72014027  | 0.000191518389025585  |
| Slc6a13       | -1.717785118 | 0.127854003433465     |
| Dmd           | -1.716679947 | 0.00808233538139009   |
| Selenbp2      | -1.713046673 | 0.0360788413306155    |
| Synpo         | -1.711704304 | 4.94971545214916e-05  |
| Rmi2          | -1.710444112 | 0.00571808935032194   |
| Hopx          | -1.704041669 | 1.46379039368259e-20  |
| Gm20075       | -1.69721155  | 0.0927340243670331    |
| D330045A20Rik | -1.693023506 | 4.44354764828534e-21  |
| Atp6v0d2      | -1.690070955 | 8.59267098529343e-127 |
| Ramp3         | -1.689109425 | 0.119794170913951     |
| Tcf7l2        | -1.682133891 | 2.16037079215048e-50  |
| Il27ra        | -1.667951573 | 5.0051930201237e-16   |
| Vsig8         | -1.66605259  | 1.60282600579178e-10  |
| Rgl1          | -1.664381845 | 1.0732202013705e-137  |
| Adgrf1        | -1.660900409 | 0.0449805049234335    |
| Gbp2          | -1.643149285 | 7.37961811659904e-51  |
| Ptpn3         | -1.640598716 | 2.19993509003447e-09  |
| Ccr1          | -1.630845873 | 1.0129699297507e-141  |
| Asb4          | -1.624662177 | 8.13988425084556e-36  |
| H2-M2         | -1.62367176  | 3.26782149619321e-05  |
| Tmem154       | -1.623589537 | 4.48750120866446e-86  |
| Fzd4          | -1.621639931 | 1.95223864307658e-05  |
| H2-DMa        | -1.620579183 | 8.32360189462908e-80  |
| Rph3a         | -1.618972812 | 0.0200801674504121    |
| Lcat          | -1.618268742 | 0.00339344745603324   |



|               |                                    |
|---------------|------------------------------------|
| Rab44         | -1.615673495 2.41943386245955e-46  |
| Dpp4          | -1.608087392 0.127979642585875     |
| Pim1          | -1.607355537 2.05883456048033e-148 |
| Zfp532        | -1.605556521 1.84033835476519e-24  |
| Tnfrsf26      | -1.604590054 3.77832520868892e-58  |
| Lrrc32        | -1.599958297 4.55446351964749e-13  |
| Pard3b        | -1.597243472 0.00231406911172644   |
| Fn3k          | -1.594343758 0.00294008859649421   |
| Wnk2          | -1.59219694 7.43637574169924e-05   |
| Muc2          | -1.585692846 2.96330357225952e-06  |
| Mfsd6l        | -1.580901096 8.56995441735526e-05  |
| Glpr2         | -1.57269437 6.31007731693029e-65   |
| Clec4n        | -1.559389992 3.36977225250764e-91  |
| Cdc42ep2      | -1.55843914 3.83566226174599e-23   |
| Rab19         | -1.554752504 9.56768093070536e-17  |
| Marveld2      | -1.55027228 0.0215958555177971     |
| Vldlr         | -1.548831665 1.2118399662422e-06   |
| Klrb1a        | -1.546066078 0.0270019630467128    |
| Rgcc          | -1.538606853 3.45763297028557e-06  |
| Cacnb4        | -1.537433235 0.041203479461816     |
| Tchh          | -1.533723475 0.00518464663976752   |
| H2-DMb2       | -1.526845628 1.4771154772218e-13   |
| Trim30c       | -1.524971543 2.78078674189985e-06  |
| Arg2          | -1.512585946 2.89226630348442e-40  |
| Ttc25         | -1.509423735 0.0266892099682334    |
| Serpinb2      | -1.50344802 0.0254224328362684     |
| Alas1         | -1.497211853 2.13176862896318e-111 |
| Stap2         | -1.495596763 0.0893974616783296    |
| Egr3          | -1.491810338 3.78293477484287e-05  |
| Acod1         | -1.481470955 8.5722143376121e-20   |
| Nfe2          | -1.480187287 1.40585430401979e-09  |
| Pkdcc         | -1.467560257 2.15186147502503e-61  |
| Cd164         | -1.465327546 4.32844266153664e-80  |
| 4930590J08Rik | -1.462052416 0.122803918855314     |
| Papss2        | -1.458869527 4.14843003857771e-44  |
| Lrrc66        | -1.456659339 0.000371684764865023  |
| Jaml          | -1.451521457 0.000194838715219589  |
| Marco         | -1.449795694 4.80152710935879e-19  |
| Sec14l2       | -1.449716983 0.0686590871880763    |
| Ddhd1         | -1.448043317 1.19753406002314e-83  |
| Prr5l         | -1.44383486 1.2287240383422e-19    |
| Fam43a        | -1.442228015 3.4814764392024e-27   |
| Bex1          | -1.440130481 0.000140118071644095  |
| Gpr85         | -1.431854558 1.13335793948129e-10  |
| Mag           | -1.422448583 5.98775010724911e-12  |
| Gm10778       | -1.421335695 0.0931557193201113    |
| Slc27a3       | -1.417968043 0.000184140217373108  |

|               |              |                       |
|---------------|--------------|-----------------------|
| Sell          | -1.414279476 | 5.56039520062387e-07  |
| Batf3         | -1.412338909 | 8.70447564984501e-18  |
| Cysltr2       | -1.410936286 | 0.00123080567203914   |
| Efna2         | -1.409071546 | 0.105726916094064     |
| Tgm1          | -1.407672335 | 1.33854890752869e-10  |
| 4933430I17Rik | -1.40519733  | 1.57914515582472e-05  |
| Sh2d1b1       | -1.405054823 | 3.72962881363926e-17  |
| Ptgir         | -1.394740429 | 2.69739994934247e-35  |
| Filip1        | -1.383655059 | 0.0866760046302071    |
| Itgax         | -1.37406694  | 5.60087053443663e-56  |
| Btg1          | -1.370428936 | 1.05575208015932e-122 |
| Pkp2          | -1.364923449 | 1.10047580490181e-07  |
| Ppp1r32       | -1.363894765 | 0.079465782333143     |
| Ppbbp         | -1.35364952  | 4.98188301255331e-13  |
| Actr3b        | -1.349095156 | 0.00425917749949361   |
| Hebp2         | -1.348986651 | 0.0241509727551475    |
| Thbs1         | -1.340417183 | 3.87824765696629e-51  |
| Mgst2         | -1.325717684 | 7.35641392917751e-29  |
| Adora2b       | -1.325714713 | 3.29457584791449e-12  |
| Lipn          | -1.325138797 | 0.00806517262580739   |
| P2ry1         | -1.324874248 | 5.34360195620561e-12  |
| Tenm4         | -1.319937701 | 4.13915824075949e-07  |
| Chd5          | -1.307975713 | 0.0117016106370636    |
| Plekhg1       | -1.306576173 | 8.12040674665383e-23  |
| Cdkl5         | -1.301297284 | 0.00351196962183191   |
| Adamtsl4      | -1.299402732 | 2.59907184905806e-35  |
| Adrb1         | -1.297811523 | 0.103477604652274     |
| Cd38          | -1.297406937 | 8.90949426863666e-24  |
| Ccr2          | -1.289453357 | 4.127415025355e-48    |
| Camk2a        | -1.28849621  | 1.54249633969257e-07  |
| Fas           | -1.287287158 | 5.13155341025075e-30  |
| Gstm2         | -1.286039116 | 8.09052184014913e-19  |
| Agmo          | -1.285710557 | 1.69271271529612e-05  |
| Mamdc2        | -1.283513392 | 2.67415203801092e-21  |
| Mmp2          | -1.281735877 | 4.55560696532396e-07  |
| Wfdc21        | -1.278107259 | 1.62706748456626e-08  |
| Ahr           | -1.277973252 | 2.70446456109585e-27  |
| Ly6e          | -1.276547907 | 4.25570993900253e-81  |
| S100a11       | -1.272019003 | 7.25578940355153e-55  |
| Msr1          | -1.265213837 | 4.29037725551204e-68  |
| Fzd1          | -1.261638446 | 2.53403356016285e-80  |
| Npas2         | -1.253978315 | 7.67195644810803e-15  |
| Rasgrf2       | -1.25107734  | 0.0147291415203669    |
| Plbd1         | -1.247292482 | 7.91606835071014e-15  |
| Sh3d21        | -1.243272531 | 0.0300983190823691    |
| Maoa          | -1.241827387 | 2.66100120612205e-27  |
| Lpp           | -1.237936392 | 6.03250332158551e-35  |

|               |              |                       |
|---------------|--------------|-----------------------|
| Add3          | -1.233653317 | 5.68705482256213e-47  |
| Magee1        | -1.232267357 | 4.21197796329602e-20  |
| Ramp1         | -1.232260312 | 3.52667961290935e-35  |
| Sgms2         | -1.224807996 | 1.26179802596211e-28  |
| Serpinb12     | -1.220411666 | 0.0173699883571486    |
| Clmp          | -1.219155829 | 6.28000993924405e-07  |
| Acp5          | -1.217373013 | 1.49504811673133e-42  |
| Sntb1         | -1.21576751  | 9.02656829841756e-06  |
| Adora2a       | -1.210712825 | 0.00172463980731318   |
| Gm21188       | -1.210342222 | 2.63217018392735e-29  |
| Mvd           | -1.208524615 | 3.80123970333999e-48  |
| A530032D15Rik | -1.207952209 | 0.00476678313350814   |
| Vwf           | -1.206172388 | 1.20061648012883e-40  |
| Eaf2          | -1.203129817 | 0.0378350502799102    |
| Ifit1bl1      | -1.197001031 | 0.0684302180246094    |
| Il4i1         | -1.1952165   | 0.00017463745341651   |
| Bhlhe40       | -1.191235493 | 1.26563733150486e-116 |
| Slc7a11       | -1.187271297 | 5.89678170598798e-22  |
| Ifi203        | -1.185002924 | 7.67382830293263e-23  |
| Ephx1         | -1.184079609 | 1.98403285494165e-62  |
| Pstpip2       | -1.178655432 | 3.61550106743416e-43  |
| Spp1          | -1.176973015 | 1.94425376846613e-17  |
| Kctd12        | -1.176851222 | 4.36946733192984e-77  |
| Emb           | -1.176592357 | 5.02207116220296e-73  |
| Fabp7         | -1.175354132 | 2.67846008430101e-13  |
| Csf2rb        | -1.173560408 | 5.42557013975847e-74  |
| Klra3         | -1.171486423 | 0.0198294281446917    |
| Stxbp6        | -1.170655465 | 0.133820045381867     |
| Smpdl3b       | -1.170436436 | 6.26981955087947e-15  |
| Slamf6        | -1.166777295 | 7.70023134471192e-11  |
| Abcg3         | -1.161209167 | 2.08846268357538e-16  |
| Spa17         | -1.160362711 | 0.132243448935765     |
| Gfra2         | -1.159135094 | 0.0606360875082238    |
| A930033H14Rik | -1.158812578 | 0.00318347110694006   |
| Heg1          | -1.158387474 | 2.32103791571613e-05  |
| Alox5         | -1.157845949 | 1.23701381389553e-10  |
| Grtp1         | -1.15405854  | 0.00475348344203233   |
| Bend6         | -1.152838193 | 0.00664702158202361   |
| Nod2          | -1.152020455 | 2.16142142126855e-21  |
| Mfsd2b        | -1.150573713 | 0.0209170279732934    |
| Mkl           | -1.144678128 | 5.69031768529355e-43  |
| Pced1b        | -1.143278312 | 6.60079980248157e-21  |
| Dhcr24        | -1.142585415 | 5.09904043688701e-29  |
| Arhgef37      | -1.141330067 | 0.00200832791296756   |
| Trnp1         | -1.139324222 | 0.0169367105049692    |
| BC030499      | -1.139237959 | 0.0832095995914113    |
| Bmx           | -1.134937466 | 0.000305483922757735  |

|         |                                   |
|---------|-----------------------------------|
| Tspan5  | -1.133393526 9.59840091260604e-56 |
| Cybb    | -1.133315042 1.74218241379857e-56 |
| Slc9a4  | -1.132653144 0.0131256276962862   |
| H2-Q6   | -1.132005583 0.000205379587706844 |
| Samsn1  | -1.124560679 7.47230852867554e-34 |
| Atrnl1  | -1.119891702 2.49135677843292e-44 |
| Dram1   | -1.114975371 4.65720484497648e-69 |
| Ptgs1   | -1.114536034 1.73787847552746e-60 |
| Ccl2    | -1.11401802 5.24901641957024e-07  |
| Tgfbr3  | -1.113857301 0.0011651548498678   |
| Clec4b1 | -1.112987009 8.73050866224121e-10 |
| Ier3    | -1.109511721 8.86921580880234e-36 |
| Pdgfc   | -1.10589286 7.75030027392898e-16  |
| Spef2   | -1.104012282 0.00179402468115722  |
| Zfp558  | -1.102899955 0.00302859936576307  |
| Gbp3    | -1.090647422 7.21190937789824e-13 |
| Dusp18  | -1.08994467 9.14722801200774e-13  |
| Lrp12   | -1.087036801 1.77972095026065e-67 |
| Il11ra1 | -1.085813814 2.53332673673451e-41 |
| Il1rl1  | -1.084871156 8.58134591819524e-05 |
| Pilra   | -1.083301793 3.6395882689943e-52  |
| Ctsk    | -1.081477872 2.49940531811621e-37 |
| Ksr1    | -1.081024824 3.22790787446822e-15 |
| Tifab   | -1.075919472 2.49862602688939e-84 |
| Il20rb  | -1.069974211 0.00013545021946597  |
| Zfp507  | -1.068948797 0.049448489934131    |
| Il12rb2 | -1.068060737 0.000399296089906842 |
| Gas7    | -1.067350345 1.49597961989632e-59 |
| Itgam   | -1.065110014 1.07823666473038e-37 |
| Lrrc3   | -1.061689941 0.121980183298686    |
| Slamf8  | -1.061196063 4.56273917670512e-28 |
| Bok     | -1.052132727 0.084816390052658    |
| Gprc5c  | -1.051498981 4.83864121052427e-10 |
| Il27    | -1.042126934 0.00140644879814251  |
| Mrc1    | -1.041247531 1.20839101604801e-30 |
| Tlr2    | -1.035139812 5.28723702728705e-47 |
| Tarm1   | -1.034095558 0.00270249580912331  |
| Galnt9  | -1.033552584 2.55225465309109e-08 |
| Pmepa1  | -1.030015856 1.68932370328381e-09 |
| Nedd9   | -1.026530314 9.51257729065157e-29 |
| Clec4e  | -1.024091913 4.7832516221858e-31  |
| Cd24a   | -1.023729759 1.70036138592831e-21 |
| Plaur   | -1.019530281 9.68986300214177e-27 |
| Ccl3    | -1.01597332 1.10665503428739e-21  |
| Col23a1 | -1.015784548 0.113755941096308    |
| Hif1a   | -1.010759247 2.264479761062e-48   |
| Cage1   | -1.010649849 0.0122664593137328   |

|          |              |                      |
|----------|--------------|----------------------|
| Cd86     | -1.006732324 | 2.96604075505754e-26 |
| Mfsd7a   | -1.00599602  | 4.04580297871161e-31 |
| Slc2a6   | -1.00027093  | 1.94238281813921e-15 |
| Pik3ap1  | 1.00145809   | 1.43788209810382e-31 |
| Cela1    | 1.001726193  | 2.4766782095819e-14  |
| Isg20    | 1.003027703  | 0.0160305649132706   |
| Cryba4   | 1.003701636  | 0.0129771893972117   |
| Arhgap27 | 1.004744109  | 6.62650177919493e-29 |
| Slc28a2  | 1.005768377  | 5.81143797613209e-15 |
| Gas6     | 1.008374135  | 1.82680355348556e-67 |
| Xylt2    | 1.010365261  | 9.50630691597572e-58 |
| Syne1    | 1.011377681  | 8.11863929956848e-20 |
| Lama3    | 1.01354917   | 0.00764878543984043  |
| Itgav    | 1.015034758  | 1.4644438128305e-50  |
| Ccdc85b  | 1.020165081  | 0.132735967825275    |
| Mthfd2   | 1.020373497  | 4.44354764828534e-21 |
| Trem14   | 1.021116006  | 3.52909505433958e-06 |
| Smad6    | 1.02128384   | 8.06747417911161e-05 |
| Lpar5    | 1.022770538  | 5.47811073386115e-12 |
| Anks6    | 1.024121124  | 1.86110928842147e-09 |
| Vipr1    | 1.024150177  | 0.00140560630028705  |
| Tfrc     | 1.024335593  | 1.39879814161633e-38 |
| Loxl3    | 1.026511609  | 1.7073046558009e-08  |
| Efr3b    | 1.029448284  | 4.89983625658322e-08 |
| Irf2bpl  | 1.030872392  | 6.21559352911736e-07 |
| Prkaa2   | 1.032354076  | 0.100513204635534    |
| Zfpm1    | 1.038021403  | 3.25088642430236e-06 |
| Elane    | 1.041527208  | 0.0166121703913045   |
| Ms4a7    | 1.043681991  | 8.27461373938146e-66 |
| Fkbp10   | 1.047538551  | 0.090543099832475    |
| Inpp5j   | 1.047584971  | 7.37528263177006e-07 |
| Cdk18    | 1.047852917  | 4.95956215463316e-30 |
| Mmp9     | 1.053062611  | 0.0010846810968792   |
| Cacna1b  | 1.053080497  | 0.122872730714423    |
| Abcb4    | 1.053545457  | 6.60460776980801e-15 |
| Fgd2     | 1.054102664  | 3.65835991888909e-27 |
| Mid1     | 1.054136943  | 9.64120992900021e-08 |
| St3gal5  | 1.054302211  | 5.7130486576555e-33  |
| Kif18a   | 1.060995881  | 0.00350771527426502  |
| Fam83f   | 1.061763095  | 1.12571699473064e-13 |
| Ankdd1a  | 1.065567969  | 0.0010600631085544   |
| Abcc3    | 1.067190836  | 2.43332660364805e-83 |
| Syt11    | 1.06909067   | 8.000559934569e-23   |
| Crip2    | 1.070141861  | 0.000847516417125589 |
| Mmp10    | 1.071625776  | 0.0441925351031374   |
| Armcx2   | 1.07954762   | 0.00530364731349609  |
| Plau     | 1.082256909  | 2.14293223226357e-11 |

|               |             |                      |
|---------------|-------------|----------------------|
| Akr1b8        | 1.084079038 | 2.26033416641358e-27 |
| Sh3pxd2a      | 1.084268213 | 2.46929970513897e-26 |
| Acta2         | 1.089315508 | 2.55092835004663e-07 |
| Srp54         | 1.091144993 | 0.0078103483226203   |
| Gabbr2        | 1.093842902 | 0.0202624835411206   |
| Rims3         | 1.096853044 | 2.05098034399501e-14 |
| Fam26f        | 1.09721658  | 6.08245691074918e-07 |
| Tpbgl         | 1.102378695 | 9.55570340293535e-07 |
| Arl4d         | 1.102382986 | 0.0472141243555289   |
| Mfsd6         | 1.106461776 | 1.8432566533701e-35  |
| Mpo           | 1.106829759 | 2.40796358036212e-05 |
| Nav2          | 1.111597961 | 7.77701523857212e-26 |
| Smyd4         | 1.117756552 | 3.46472647410151e-10 |
| Dlec1         | 1.11973943  | 0.148268210487242    |
| Ttc39a        | 1.120851224 | 0.00336017697615841  |
| Myliip        | 1.12261536  | 1.81442045582876e-38 |
| Mxra8         | 1.126109087 | 0.03224107048028     |
| Plppr2        | 1.126238025 | 0.000218320033566033 |
| Gm1673        | 1.127959296 | 0.105887645812995    |
| Col11a2       | 1.13002222  | 2.58682161853041e-07 |
| Nes           | 1.130346371 | 1.91743210052068e-19 |
| Zbtb16        | 1.131209758 | 0.00420239247505977  |
| Smo           | 1.131892512 | 1.85159210353923e-07 |
| Ctse          | 1.132230733 | 0.00112052199791411  |
| A530064D06Rik | 1.138375029 | 5.26277315453414e-28 |
| Fam129a       | 1.139773164 | 1.85519093269323e-37 |
| Arfgef3       | 1.143849261 | 0.000962824012054171 |
| Unc5b         | 1.143865277 | 2.481566770271e-05   |
| Ccdc85c       | 1.145700878 | 0.0619864525698602   |
| Fstl1         | 1.147104892 | 0.000490657249489562 |
| Bcam          | 1.147704923 | 0.0226600569967361   |
| Pdgfb         | 1.148901294 | 1.98137616178984e-25 |
| Nr1h3         | 1.154097129 | 7.1264861165629e-23  |
| Ccl12         | 1.155984918 | 5.11323432214897e-06 |
| Fbln2         | 1.157848287 | 0.00813557802863342  |
| Ralgps1       | 1.166993057 | 7.39511603373657e-13 |
| Col8a1        | 1.169238264 | 0.115193908471538    |
| Grem1         | 1.172165537 | 0.0399804496309105   |
| Camk2n2       | 1.176550951 | 0.0158137186671428   |
| Rin1          | 1.178694862 | 0.020040680104032    |
| Fam102a       | 1.179112575 | 1.71353399836422e-33 |
| Ust           | 1.179177263 | 0.00097986400140903  |
| Spsb1         | 1.179414081 | 1.09172324159033e-14 |
| Plod2         | 1.181493798 | 1.51485116652864e-06 |
| Itpr3         | 1.182237092 | 1.00824390407477e-27 |
| Gm5160        | 1.18930176  | 0.0762528006910852   |
| Rpgrip1       | 1.193789658 | 0.0156318052911353   |



|               |             |                      |
|---------------|-------------|----------------------|
| Me1           | 1.194230717 | 1.36551818759847e-07 |
| Gsdme         | 1.196207265 | 1.00187856709979e-08 |
| Rnf144a       | 1.196966291 | 0.00509378639631346  |
| Npdc1         | 1.213898969 | 0.000963484554545542 |
| Tnk2          | 1.215214886 | 6.73694489259013e-07 |
| Hyal1         | 1.216975079 | 2.53733151851844e-13 |
| Igfbp7        | 1.218484231 | 0.0031092099490537   |
| Cdk15         | 1.224705458 | 9.04085646578979e-05 |
| Plekhh2       | 1.226027016 | 9.58852479536652e-08 |
| Endou         | 1.229310794 | 0.10526632187127     |
| Ms4a3         | 1.229633477 | 0.114439832186901    |
| Insl3         | 1.232633604 | 0.102067482539559    |
| Col12a1       | 1.244555509 | 0.0364839113842988   |
| Pbx4          | 1.246077249 | 0.0375216111783055   |
| Serpinb6b     | 1.255735491 | 1.7073046558009e-08  |
| Col1a2        | 1.257245683 | 0.000218320033566033 |
| Adcy3         | 1.258509511 | 5.17210072649809e-22 |
| Mefv          | 1.268101218 | 1.84504220983128e-26 |
| Tmem171       | 1.268215009 | 1.64333089217733e-12 |
| Rab4b         | 1.268462604 | 0.00304269716839517  |
| Cd40          | 1.275366967 | 2.03377399052429e-14 |
| Pcdhgb7       | 1.275885547 | 0.113265160795293    |
| Col5a2        | 1.27598139  | 0.000256453251314419 |
| Ankrd22       | 1.276346464 | 0.140046583955277    |
| Dbn1          | 1.278864776 | 0.00436141880923394  |
| Tmem8         | 1.284926504 | 7.83213785642014e-61 |
| St3gal6       | 1.288455456 | 0.00464549264551581  |
| Zc3h12d       | 1.290053816 | 8.68296598451934e-52 |
| Tom1l1        | 1.291390123 | 0.000126360458904349 |
| Slc24a5       | 1.294025542 | 0.000273880270304763 |
| Rab42         | 1.294374728 | 0.100850878324978    |
| Tle1          | 1.295989813 | 2.17910116474069e-22 |
| Il18bp        | 1.301595076 | 4.50315438212759e-24 |
| Mageh1        | 1.30385807  | 0.0320422284285983   |
| Hcn2          | 1.306202056 | 0.00607647444323251  |
| 2900026A02Rik | 1.308713434 | 3.7788073325832e-41  |
| CAA01147332.  | 1.318954967 | 0.116723318820108    |
| Prag1         | 1.331381601 | 3.49588527816556e-21 |
| Ddr2          | 1.337221365 | 0.0818164703450715   |
| Ctnnd2        | 1.347610241 | 6.06289511852154e-05 |
| Cdk5r1        | 1.349816248 | 0.00200210404022964  |
| Ube2v1        | 1.353063226 | 0.146884751250143    |
| Acsbg1        | 1.35485071  | 0.00817307318550128  |
| Hmox1         | 1.355773911 | 1.9222228239943e-150 |
| Cfap126       | 1.356360462 | 0.00140581779890069  |
| B9d1          | 1.363109906 | 0.0784118840764761   |
| Adam8         | 1.365543229 | 1.01281762773621e-47 |

|           |             |                       |
|-----------|-------------|-----------------------|
| Raet1e    | 1.366194954 | 0.000877303647445344  |
| Wnt9a     | 1.374717538 | 0.0386786190551543    |
| Tmem158   | 1.377566912 | 0.00269350348168682   |
| Ctgf      | 1.382454498 | 3.89753801945079e-09  |
| Cxcr3     | 1.382511858 | 1.49111141515454e-17  |
| Tspan33   | 1.385432165 | 0.00275522323610833   |
| Rps12-ps3 | 1.387341052 | 0.0622313673069207    |
| Amotl1    | 1.391046297 | 0.000420137521178019  |
| Aox2      | 1.391955497 | 0.119953285205363     |
| Col14a1   | 1.394038722 | 0.00013862397788372   |
| Dpysl3    | 1.399859695 | 0.118299562969497     |
| B3gnt2    | 1.402519078 | 0.0490881696796183    |
| Apbb1     | 1.403014925 | 0.00713458694461359   |
| Tagln     | 1.412351053 | 1.51964697909671e-08  |
| Cox6a2    | 1.417843331 | 0.021457972418262     |
| Pdgfrb    | 1.418428631 | 0.00934354615615842   |
| Gm10358   | 1.421490536 | 0.0453517063376449    |
| Sdc2      | 1.423105981 | 0.00122717358437992   |
| Hap1      | 1.424223799 | 0.000119402461593886  |
| Por       | 1.425175001 | 3.92225363147247e-67  |
| Edil3     | 1.426412088 | 2.90907752043185e-11  |
| Mtmr11    | 1.434952017 | 3.28296198980255e-20  |
| Tmem26    | 1.439305732 | 9.65138092711949e-18  |
| Ssc5d     | 1.441983276 | 0.114439832186901     |
| Ptar1     | 1.444548094 | 1.03496948089898e-05  |
| Slc13a3   | 1.446169675 | 7.38151539708395e-06  |
| Gdf15     | 1.448844952 | 1.82733734478933e-05  |
| Tspan13   | 1.450108323 | 4.50095461821762e-30  |
| Grap      | 1.453740864 | 1.56818869070565e-37  |
| Cd300ld5  | 1.455775642 | 0.0022919225376955    |
| Gja1      | 1.457247417 | 2.97216195149024e-09  |
| Epor      | 1.457471055 | 0.00705850911357319   |
| Arhgap22  | 1.461164664 | 4.86693795698557e-112 |
| Ociad2    | 1.465419029 | 2.69557078045766e-09  |
| Ctla2b    | 1.466476806 | 3.56162555060729e-06  |
| Rundc3a   | 1.46833002  | 0.0899051873482836    |
| Mroh6     | 1.469297032 | 0.0152342418216975    |
| Cxcr2     | 1.470341201 | 0.0185140986729545    |
| Loxl2     | 1.474488241 | 0.00408114095500257   |
| Dusp1     | 1.476913854 | 1.2028450318691e-25   |
| Cacna1a   | 1.482864563 | 8.81417992742364e-18  |
| Gng10     | 1.483968058 | 0.0878919199526999    |
| Gdap111   | 1.488624711 | 0.0432260374138074    |
| Samd11    | 1.490903712 | 0.144735529949342     |
| Bmp1      | 1.491804645 | 0.0337953072783864    |
| Trib3     | 1.494812416 | 9.53228363010665e-09  |
| Glrp1     | 1.496292245 | 0.0461779208031968    |

|            |             |                      |
|------------|-------------|----------------------|
| Shc2       | 1.501038122 | 0.13403406342778     |
| Fermt2     | 1.502666019 | 0.0582625948938583   |
| Pip5k1b    | 1.50671657  | 6.43479151353807e-05 |
| Raet1d     | 1.507026085 | 1.40229477682558e-08 |
| Vash2      | 1.509048242 | 0.00108285127176419  |
| Cx3cr1     | 1.510246288 | 1.53821457040686e-54 |
| Igfbp6     | 1.522603355 | 0.0445238587530005   |
| Col4a1     | 1.523201044 | 0.000483812580286397 |
| Serpinh1   | 1.525006631 | 1.56771980737033e-05 |
| Rhoj       | 1.526494556 | 1.61109787423774e-12 |
| Col16a1    | 1.527232501 | 0.119373948720265    |
| Bgn        | 1.529794865 | 4.31370067981053e-05 |
| Phldb2     | 1.530075065 | 0.0849965129789769   |
| Rasgrp3    | 1.539886257 | 1.22759328552929e-30 |
| Gipc2      | 1.541616184 | 0.0190997773213805   |
| Havcr2     | 1.544692883 | 1.45693033948366e-32 |
| Carmil1    | 1.545290517 | 2.56708410563671e-27 |
| Cspg5      | 1.545432919 | 0.0462716156165565   |
| Zfp771     | 1.545982974 | 0.0325136552181605   |
| C4b        | 1.548364709 | 2.93194892121984e-17 |
| Rab43      | 1.555640572 | 1.92667477763758e-05 |
| Zfp827     | 1.5563568   | 0.10893885697219     |
| Il10       | 1.556644172 | 0.0329496075129556   |
| St6galnac2 | 1.564884995 | 0.0131311711623167   |
| Ccnd1      | 1.566767895 | 1.67843807634743e-40 |
| Grasp      | 1.567255969 | 0.120110416646544    |
| Tinagl1    | 1.567345892 | 0.118299562969497    |
| Map3k9     | 1.570856448 | 3.94460144473603e-21 |
| Itgb3      | 1.580504029 | 5.82583087830816e-12 |
| B3galt5    | 1.584506534 | 0.0549593057022737   |
| Rdh12      | 1.585551237 | 5.90882709435919e-06 |
| Adgrg1     | 1.589796523 | 1.33635449135284e-07 |
| Gdpd5      | 1.598249775 | 2.82335810134535e-37 |
| Ptpn14     | 1.598719951 | 0.127891740067686    |
| Thbs2      | 1.603298881 | 0.000474752233865174 |
| Bdh2       | 1.60478966  | 0.0186837163669458   |
| Scand1     | 1.615185027 | 0.0648514513186038   |
| Fosb       | 1.621340654 | 0.00463377776922344  |
| Fhod3      | 1.623276817 | 0.00043199030362674  |
| Ltbp1      | 1.623344643 | 0.101044202989202    |
| Ptprf      | 1.625872457 | 0.0246068384062632   |
| Ndr4       | 1.626817898 | 0.0140006705711061   |
| Fcrls      | 1.629169094 | 1.11492673171114e-73 |
| Fat1       | 1.629685894 | 0.0113829456754428   |
| Pla2g2e    | 1.632174389 | 0.00093668865218882  |
| Col1a1     | 1.644345895 | 1.73967644531302e-11 |
| Slc24a3    | 1.650239899 | 5.1509119279659e-17  |

|               |             |                       |
|---------------|-------------|-----------------------|
| Sparc         | 1.651322444 | 5.9114541005545e-09   |
| Col4a5        | 1.651461359 | 2.54317099364037e-05  |
| Lyzl4         | 1.653030394 | 1.64600900567549e-09  |
| Jag1          | 1.675988957 | 3.68910759590214e-68  |
| Fosl1         | 1.679652877 | 1.82144319526839e-07  |
| Atf1          | 1.681701125 | 2.73328117869674e-05  |
| Mrvi1         | 1.683283211 | 0.0720182584698831    |
| Cd5           | 1.687324198 | 0.00343008520403808   |
| Aox1          | 1.705299342 | 0.000166331054981061  |
| Pgbd5         | 1.713570899 | 0.0431785512945559    |
| Pcdhgc3       | 1.713794105 | 2.84237670969299e-08  |
| Cd244         | 1.714460339 | 3.39329710453476e-09  |
| Htr2a         | 1.71468838  | 0.00177694925609183   |
| Cd5l          | 1.719728468 | 2.08140546153893e-127 |
| Rtn4rl1       | 1.731302823 | 1.35379368881355e-11  |
| Cdh11         | 1.734514539 | 0.00397324756950888   |
| Plcb4         | 1.734864002 | 0.00060138286214454   |
| Smoc1         | 1.735596465 | 0.0906192150229801    |
| Cmtm8         | 1.73665843  | 0.00039930136040998   |
| Plxna4        | 1.739342074 | 0.00116348721889425   |
| Serpine2      | 1.739912796 | 2.85172777527168e-08  |
| Capn3         | 1.744190965 | 0.0350541182762788    |
| Antxr1        | 1.746050323 | 0.000128491868694763  |
| 2010300C02Rik | 1.74818106  | 0.015356559714726     |
| Pcdhgb2       | 1.750016067 | 0.0154914807653722    |
| Dusp8         | 1.766363494 | 5.47050168802399e-08  |
| Myadm12       | 1.774624067 | 0.10469514397256      |
| Zfyve28       | 1.777566422 | 2.98240531230655e-52  |
| Htr2b         | 1.78314519  | 4.09089458055601e-13  |
| Vsig4         | 1.789594393 | 4.30359492952342e-20  |
| Bcar1         | 1.790067001 | 0.0365612643362608    |
| Bcl6          | 1.792524584 | 3.46286129354357e-91  |
| Gm42517       | 1.792551997 | 3.99630670709019e-06  |
| Emp2          | 1.803055472 | 3.83677891464465e-19  |
| Adamts14      | 1.820432365 | 0.0699022637419263    |
| Hspg2         | 1.826639744 | 0.000216890530977696  |
| Serpinb1c     | 1.832285521 | 0.016139674611216     |
| Fhad1         | 1.834945627 | 2.47536642352437e-09  |
| Akap12        | 1.83504778  | 0.0396946148173334    |
| Angptl2       | 1.838175748 | 2.46307023225043e-84  |
| Hspb1         | 1.844042124 | 0.123256792624504     |
| Gm996         | 1.856612628 | 0.0989791942461486    |
| Phgdh         | 1.86121858  | 6.8047687531105e-22   |
| Myf9          | 1.867889823 | 0.0271194011807651    |
| Adra1a        | 1.868077488 | 1.04208000188152e-47  |
| Col3a1        | 1.874073633 | 9.79225356797725e-05  |
| Prss23        | 1.87956871  | 0.000893930310458068  |

|               |             |                       |
|---------------|-------------|-----------------------|
| Actg2         | 1.895880966 | 0.0102369358999448    |
| Slc1a3        | 1.896070893 | 1.73436956905964e-06  |
| Adgrl4        | 1.910217641 | 0.127212890143781     |
| Fbxl16        | 1.925331527 | 0.00321426214355369   |
| Svs1          | 1.92771308  | 0.0578721615303085    |
| Asns          | 1.933179033 | 3.73042056840604e-51  |
| Fhit          | 1.938099452 | 0.0522264393820295    |
| Itga11        | 1.94725041  | 0.146156418380813     |
| Serpine1      | 1.957019558 | 2.4826206314828e-24   |
| Adgra2        | 1.957933293 | 0.0190457195979348    |
| Dmwd          | 1.967238991 | 1.77782542013427e-24  |
| Crlf1         | 1.969994237 | 0.125620500365514     |
| Rd3           | 1.976920954 | 0.0485384735448447    |
| Slc6a19       | 1.9784595   | 6.60997173301081e-08  |
| Sarm1         | 1.982869082 | 0.0599697227221476    |
| Sez6l2        | 1.999797949 | 1.31038875219365e-06  |
| Aldoa         | 2.005085325 | 0.0110209281771141    |
| Gpr183        | 2.016938239 | 3.31887863969624e-29  |
| Kdr           | 2.03051077  | 0.000242111586648174  |
| F830045P16Rik | 2.04250051  | 0.0289573566540941    |
| Col6a1        | 2.042748551 | 0.0918754417829636    |
| Fbln5         | 2.066596901 | 0.0344792942333151    |
| Dcbld1        | 2.068834241 | 0.0692868866822005    |
| Soat2         | 2.073575261 | 4.5943007330588e-06   |
| Smpd3         | 2.07429717  | 5.98682374034075e-18  |
| Pacrg         | 2.086274706 | 4.29280412312375e-05  |
| Pxdc1         | 2.097943642 | 0.0132953842305471    |
| Ntn1          | 2.104647423 | 0.000214590705775786  |
| Pcdh7         | 2.106364919 | 2.5441084760737e-14   |
| Nid2          | 2.110033521 | 0.000992197842518977  |
| Zdhhc23       | 2.11266158  | 0.0389980187362333    |
| Rhobtb3       | 2.112971919 | 0.00702312379573534   |
| Ptchd1        | 2.123667539 | 9.35907711119942e-10  |
| Folr2         | 2.136301045 | 4.31947652857248e-35  |
| Epn2          | 2.151617969 | 8.83554837789228e-26  |
| Col5a1        | 2.153911787 | 0.0409292743872277    |
| Slc6a9        | 2.160658475 | 0.0143743908214677    |
| Fbn1          | 2.172400021 | 0.081522809107193     |
| Asb10         | 2.177240268 | 3.67401538975628e-05  |
| Ankrd29       | 2.182947213 | 0.0476103924379674    |
| Jag2          | 2.188691807 | 0.0104694844057845    |
| Ccr3          | 2.196725603 | 2.2954993143767e-24   |
| Cdkn1c        | 2.212481678 | 3.25640944100122e-18  |
| Itga9         | 2.235892522 | 4.90141473154465e-54  |
| Shisa9        | 2.258556525 | 1.35803103058071e-25  |
| P4htm         | 2.268646099 | 0.121050974675121     |
| Pltp          | 2.27077948  | 1.14508335001895e-170 |

|               |             |                       |
|---------------|-------------|-----------------------|
| Rab4a         | 2.281373586 | 2.30048984781287e-18  |
| Dusp9         | 2.290959649 | 1.12396085094566e-06  |
| Ctla2a        | 2.291823015 | 8.9978651367386e-21   |
| Pcp4l1        | 2.300169271 | 4.36446771416834e-33  |
| Ephb3         | 2.330319922 | 0.00769012679849858   |
| Npy           | 2.339474713 | 2.94250190191618e-32  |
| Grb10         | 2.340578104 | 0.133625824137927     |
| Fcrl1         | 2.34784602  | 3.80760869328782e-59  |
| Prss46        | 2.349831521 | 2.13230833872544e-06  |
| Rapgef3       | 2.35079585  | 2.47046861163684e-27  |
| Cdkn2a        | 2.399511854 | 2.43075186503885e-07  |
| Fmod          | 2.405370997 | 0.125139061744029     |
| Lamb1         | 2.415285863 | 0.00219796081903924   |
| Csgalnact1    | 2.44588618  | 0.12439743442531      |
| Ccdc87        | 2.447588385 | 0.127829398230271     |
| Fgf1          | 2.451316096 | 0.0495342576921568    |
| Rab33a        | 2.456215814 | 0.10630013584873      |
| Kirrel        | 2.458284015 | 0.0179337860354268    |
| Ncam1         | 2.459082575 | 0.00512510393383341   |
| Cdkn2b        | 2.466694075 | 1.57829269155679e-10  |
| Tgfb2         | 2.477670769 | 0.0139796900723509    |
| Gm826         | 2.480875372 | 0.0279746318288142    |
| Nrcam         | 2.483070093 | 2.96698036330844e-07  |
| Pla2g5        | 2.490040832 | 0.0040694387717213    |
| Tnc           | 2.497282931 | 6.57234485367744e-18  |
| Chst13        | 2.518774323 | 0.101753128692209     |
| Osbp2         | 2.524499302 | 0.0115002044018064    |
| Cd72          | 2.525863329 | 3.12955854446291e-137 |
| Slc1a4        | 2.529889369 | 1.43746773609734e-07  |
| Sptb          | 2.541120878 | 0.0762528006910852    |
| Olfml3        | 2.541136453 | 1.80450011833302e-102 |
| Dusp27        | 2.541790332 | 0.116798330095554     |
| Fhl1          | 2.547697122 | 0.114108235041844     |
| Rbms3         | 2.559759069 | 0.133820045381867     |
| Srpx2         | 2.565484096 | 0.0600515817240013    |
| Tbx15         | 2.575207328 | 0.110780278624024     |
| Tm4sf1        | 2.579941083 | 0.0373878022513844    |
| Gzmd          | 2.588133024 | 0.0720389948460196    |
| Cspg4         | 2.607741717 | 9.35090247661918e-21  |
| Chac1         | 2.611050949 | 1.13375730758544e-11  |
| Dusp4         | 2.623660771 | 1.88267258120917e-72  |
| Plcd3         | 2.63527518  | 3.64707921792342e-05  |
| Asb2          | 2.641364395 | 7.14001081036737e-11  |
| Vstm4         | 2.651332088 | 0.00137431846651404   |
| 9530053A07Rik | 2.655347294 | 0.11594807362762      |
| Syt13         | 2.665138229 | 0.0268327868135596    |
| Cavin2        | 2.669864107 | 0.0886157923058641    |



|          |             |                      |
|----------|-------------|----------------------|
| Saxo2    | 2.693341338 | 0.0968217459206012   |
| Epdr1    | 2.700401497 | 1.71844106506042e-05 |
| Sytl4    | 2.712729282 | 0.060849467127931    |
| Cd300e   | 2.71738769  | 0.00140644879814251  |
| Tgfb3    | 2.744346642 | 0.0019245343779073   |
| Prss50   | 2.759593552 | 0.127829398230271    |
| Gm21887  | 2.760760116 | 0.00562312820562541  |
| Zdhhc15  | 2.792160533 | 0.0156127764178517   |
| Ebf1     | 2.81300544  | 0.13018103322374     |
| Sncaip   | 2.816270046 | 6.24372665285105e-17 |
| BC051142 | 2.821108014 | 0.0750739664008869   |
| Enpp2    | 2.827859533 | 0.0726275660252634   |
| Pcdhga5  | 2.831356677 | 0.00509378639631346  |
| Tmem163  | 2.867777591 | 6.29960977600503e-06 |
| Dmpk     | 2.879071313 | 7.01708964505393e-25 |
| Loxl1    | 2.906429588 | 0.00168667688438126  |
| Csdc2    | 2.921870081 | 0.0369892101984427   |
| Ifitm10  | 2.960225199 | 0.0175212666816793   |
| Chst2    | 2.970716898 | 0.0262011296959641   |
| Amotl2   | 2.971116047 | 0.000193373137335985 |
| Phf24    | 2.990790551 | 0.0285888130671675   |
| Sema3c   | 2.996100078 | 0.000483682976682674 |
| Dnah1    | 3.016969402 | 0.0689326059641157   |
| Dner     | 3.021690391 | 1.48466714364585e-15 |
| A4galt   | 3.034192219 | 0.0233765635282012   |
| Dusp14   | 3.05096177  | 0.00144740568594336  |
| Pcsk1    | 3.071294541 | 0.00689643913705346  |
| Slc6a17  | 3.104796625 | 0.00225612160496353  |
| Bik      | 3.108709686 | 0.0120227660681229   |
| Id3      | 3.109941369 | 1.67978355898193e-25 |
| Ptprn    | 3.111138518 | 6.37085407136579e-26 |
| Hmga2    | 3.123138291 | 1.78310951642841e-37 |
| Serping1 | 3.124924114 | 0.054672134279865    |
| Nanos1   | 3.129333763 | 3.16817439176059e-39 |
| Tmem178  | 3.135414074 | 0.00109005329028087  |
| Gnao1    | 3.152567304 | 0.118207023677906    |
| Fam19a3  | 3.159709133 | 0.0437047420244952   |
| Galnt2   | 3.175258311 | 0.0188235696406726   |
| Ccr1l1   | 3.178724238 | 0.0119890038409499   |
| Arhgap42 | 3.214648241 | 0.113919657439577    |
| Igdcc4   | 3.234199691 | 0.0567895639444807   |
| Klrb1c   | 3.24701831  | 0.00529772860227889  |
| Ppm1e    | 3.260865804 | 1.37287027069102e-10 |
| Lgr6     | 3.285581661 | 0.00561979730788259  |
| Smoc2    | 3.286887141 | 0.13240998886795     |
| Flnc     | 3.287408648 | 0.000506638075952289 |
| Camsap3  | 3.304549246 | 0.000200840201181351 |

|               |             |                      |
|---------------|-------------|----------------------|
| Kcnn1         | 3.311161307 | 2.45981036769944e-07 |
| Arhgef19      | 3.341536372 | 0.0112637085821245   |
| Mapk11        | 3.34877458  | 9.47264798296348e-14 |
| Cdcp1         | 3.368076907 | 0.0643147454505886   |
| Pcdh18        | 3.378105254 | 0.00724724630651116  |
| Tcte2         | 3.397080681 | 0.0338337053035402   |
| Notch4        | 3.46314575  | 4.90289180258768e-06 |
| A830005F24Rik | 3.480182442 | 0.0465263227361819   |
| Foxc1         | 3.512020426 | 0.0402229249702606   |
| Tppp          | 3.554507987 | 0.103549414546019    |
| Grem2         | 3.568868421 | 0.0083150060086598   |
| Tpbp          | 3.584691458 | 0.141186539447974    |
| Adcy2         | 3.587390699 | 7.82116160999307e-05 |
| Hist1h1a      | 3.62147932  | 0.131723548090694    |
| Tox2          | 3.622608524 | 1.59100878947644e-06 |
| Sh2d6         | 3.638946498 | 1.65448121530076e-05 |
| Olfml2a       | 3.667407357 | 0.114669536043347    |
| Gpm6b         | 3.687850593 | 0.00952812320797981  |
| Igsf11        | 3.691054731 | 0.00105450406042316  |
| Katnal2       | 3.697981265 | 0.0297542221297676   |
| Gprc5a        | 3.736891585 | 0.0107921041507521   |
| Col18a1       | 3.774913224 | 1.54863871850659e-43 |
| Pcdhga2       | 3.784964341 | 0.0105997908403365   |
| Preli3a       | 3.792646877 | 1.32317203114418e-08 |
| Syndig1l      | 3.800141397 | 0.0194752420386809   |
| Mgat3         | 3.81553935  | 0.00683010952228774  |
| Etv4          | 3.870489852 | 0.00211639706142194  |
| Cpe           | 3.931925689 | 1.01305285944052e-13 |
| Zfp618        | 4.004089998 | 3.76380465889575e-10 |
| Hao1          | 4.038646634 | 0.000120420322499292 |
| Fjx1          | 4.046711601 | 0.0688991408588822   |
| Ankrd6        | 4.102797701 | 0.00210223269565695  |
| Prrg4         | 4.135912377 | 0.00456807898855578  |
| Enho          | 4.151230436 | 4.0405422891939e-07  |
| Nxn1l         | 4.179236894 | 0.124893663908428    |
| Slc17a8       | 4.248314807 | 0.00131343546414734  |
| Zdhhc2        | 4.297601576 | 1.74815188043498e-07 |
| Kcna4         | 4.338811111 | 0.00508791061315887  |
| Kcnh2         | 4.345414638 | 2.40994953724e-07    |
| Prkg2         | 4.421399808 | 0.0267883208291076   |
| Kcnk12        | 4.431629684 | 4.15206212993017e-05 |
| Obsl1         | 4.451070498 | 0.0930283411990827   |
| Crybb1        | 4.467747086 | 0.0714972551545126   |
| Pear1         | 4.477217382 | 1.76239916816299e-05 |
| Prss39        | 4.485548329 | 0.115548663183879    |
| Atp8b5        | 4.485997671 | 0.0915915152427747   |
| Rgs4          | 4.498103533 | 0.106154749876611    |

|           |             |                      |
|-----------|-------------|----------------------|
| Pxdn      | 4.508504191 | 0.000145912518349065 |
| Aldh1a1   | 4.560954208 | 0.111579824364575    |
| Steap4    | 4.594288594 | 2.48266266135423e-10 |
| Fzd2      | 4.633001579 | 0.0662600899002877   |
| Nyx       | 4.656831474 | 0.115711994970624    |
| Fsip1     | 4.675315849 | 0.000474752233865174 |
| Gdf11     | 4.691206774 | 0.0584665723556525   |
| Akap5     | 4.721490588 | 0.071823113546144    |
| Dnali1    | 4.736252879 | 0.068550426138519    |
| Gper1     | 4.742000577 | 0.105178007501499    |
| Ccdc96    | 4.765470122 | 0.00248953185836542  |
| Des       | 4.877735737 | 0.0527456465620845   |
| Tnfrsf11b | 4.883810477 | 0.066594789275122    |
| Hist1h4b  | 4.889402531 | 0.0906348996927058   |
| Smad9     | 4.892444866 | 0.0562668161561728   |
| Ret       | 4.947120443 | 0.0432026827641644   |
| Pgm5      | 4.976761838 | 3.37024933658298e-09 |
| Dpep1     | 5.131676646 | 0.0515681666156702   |
| Fbln1     | 5.133063853 | 0.0360596346018786   |
| Jph2      | 5.167817326 | 0.0232836987252533   |
| Pcdhb4    | 5.192344644 | 0.02423284335362     |
| Gpx8      | 5.196562955 | 0.00035507591979064  |
| Trim17    | 5.325948025 | 0.0112867362265836   |
| S100a3    | 5.429482634 | 0.018382624084649    |
| Gm9887    | 5.441217858 | 0.0378669701550904   |
| Ephb4     | 5.479900821 | 0.0140969540752996   |
| Gas1      | 5.508582819 | 0.0162330458398982   |
| Adam12    | 5.526421714 | 0.0128213022319375   |
| Gata3     | 5.531705196 | 0.0113709904990947   |
| Tfr2      | 5.642604219 | 0.00440588257689916  |
| Gm3854    | 5.6608907   | 0.145369088139576    |
| Thy1      | 5.6693406   | 0.137006968476591    |
| Tll1      | 5.756435251 | 0.130768690485364    |
| Cyp2s1    | 5.775935459 | 2.92614829466027e-05 |
| Trpc6     | 5.848905793 | 0.115191380183509    |
| Actl10    | 5.852020481 | 0.116751391115491    |
| Clic5     | 5.859904478 | 0.00340654701146963  |
| Cr2       | 5.863773862 | 0.116122221263885    |
| Heph      | 5.865682529 | 0.00530364731349609  |
| Klhdc8a   | 5.86629382  | 0.141110220588029    |
| Foxd4     | 5.884173195 | 0.112557847600105    |
| Fcrl5     | 5.90770998  | 0.00393983975427729  |
| Spock2    | 5.930257673 | 0.111840782592394    |
| Hist2h3b  | 5.938265905 | 0.129426470466149    |
| Popdc2    | 5.961037242 | 0.134873967461428    |
| Pcdhb18   | 5.961856186 | 0.123111339550971    |
| Hist1h4m  | 5.986027053 | 0.1257932214237      |

|           |             |                     |
|-----------|-------------|---------------------|
| Rprm      | 5.992948643 | 0.0877419157386519  |
| Col4a6    | 5.998203176 | 0.120654905844718   |
| Foxs1     | 6.00647526  | 0.00218457321562429 |
| Fgf17     | 6.024469842 | 0.0927340243670331  |
| Apol8     | 6.026045408 | 0.0808096960298775  |
| Slc1a6    | 6.034334761 | 0.12226989173663    |
| Col6a4    | 6.040951117 | 0.0869611480154851  |
| Fcmr      | 6.04403566  | 0.00206741472169757 |
| Tspan12   | 6.044235948 | 0.115424198023199   |
| Nfasc     | 6.051918689 | 0.112690103267988   |
| Syce1l    | 6.072258222 | 0.1174359065147     |
| Zfhx4     | 6.072532668 | 0.124821856192102   |
| Atp1b1    | 6.080161206 | 0.00177802106883421 |
| Serpina3c | 6.091546645 | 0.0805081891165056  |
| Plvap     | 6.093814878 | 0.0788545453298962  |
| Ebf2      | 6.114935507 | 0.146165972994747   |
| Lrp3      | 6.120015535 | 0.115241263393865   |
| Aqp3      | 6.12984944  | 0.0766856464884833  |
| Zfp114    | 6.133570911 | 0.0578744146015402  |
| Clec4g    | 6.139616145 | 0.101019560765861   |
| Myct1     | 6.144797231 | 0.145384294620834   |
| Hus1b     | 6.14938213  | 0.0569486951153052  |
| Ccr10     | 6.168373298 | 0.0755984817384005  |
| Sema3a    | 6.170326312 | 0.138786438539598   |
| Qprt      | 6.181448791 | 0.135933203797091   |
| Pamr1     | 6.184438817 | 0.079465782333143   |
| Rimbp3    | 6.184884712 | 0.0989923130492076  |
| Mum1l1    | 6.190616847 | 0.0954829038869593  |
| Pcdhga8   | 6.201492826 | 0.0548388297559579  |
| Cth       | 6.231577222 | 0.0642850694683083  |
| Kcnq5     | 6.24362022  | 0.0638523134478236  |
| Cabcoco1  | 6.247608892 | 0.0988371357640535  |
| Gykl1     | 6.271282576 | 0.064740990147924   |
| Gulp1     | 6.278804228 | 0.0684302180246094  |
| Cox4i2    | 6.279717861 | 0.00105852049724201 |
| Pak3      | 6.286173274 | 0.0889633510338584  |
| Zswim5    | 6.292784861 | 0.0405627995061077  |
| Ednra     | 6.301590899 | 0.0826107668410045  |
| Serpina3n | 6.302441708 | 0.122449721097395   |
| Gjb3      | 6.303160275 | 0.119685771616955   |
| Reep1     | 6.320128278 | 0.0861430480654767  |
| Myh11     | 6.320698834 | 0.0312285257555854  |
| Morn5     | 6.358191728 | 0.0583422936185414  |
| Twist1    | 6.36234451  | 0.0408551824592754  |
| Hcn1      | 6.371691841 | 0.0530421953614445  |
| Blk       | 6.382792456 | 0.0367012665813684  |
| Dtna      | 6.390259038 | 0.107745488288421   |

|               |             |                      |
|---------------|-------------|----------------------|
| Adgrf5        | 6.43376654  | 0.00115688243253635  |
| Medag         | 6.443640759 | 0.0226373613740055   |
| Sla2          | 6.465941622 | 0.0650297027399152   |
| 1500009L16Rik | 6.466954365 | 0.0985121468574837   |
| Nrxn1         | 6.485135579 | 0.0301303819970481   |
| Cnga4         | 6.495244522 | 0.0764327933150092   |
| Spats2l       | 6.529009738 | 0.0545733950718182   |
| Gm17349       | 6.543903322 | 0.0339281495393859   |
| Ttc36         | 6.565401155 | 0.0895384448838106   |
| Hes1          | 6.594253403 | 0.000315100606347929 |
| Aif1l         | 6.596417334 | 0.017705353987905    |
| Prelp         | 6.597467149 | 0.0394999785064578   |
| Irx5          | 6.608584759 | 0.0403741073548348   |
| AY074887      | 6.615882197 | 0.0271871267539045   |
| Echdc2        | 6.626151025 | 0.0246586300430839   |
| Kctd15        | 6.626722556 | 0.05719272786846     |
| Slc6a1        | 6.630705364 | 0.0569691010983063   |
| Tmem151b      | 6.638341862 | 0.0341198120296173   |
| Ranbp17       | 6.640166359 | 0.0203011513674912   |
| Krt18         | 6.661295517 | 0.0521139562441494   |
| Negr1         | 6.665634761 | 0.0199813964747879   |
| Nrip3         | 6.681024136 | 0.0485609501476145   |
| Rnf207        | 6.706875126 | 0.0234610616579061   |
| Adgrf2        | 6.707079294 | 0.0246086813654755   |
| Gm16485       | 6.715943018 | 0.0369892101984427   |
| Lhfp14        | 6.726929101 | 0.045184009404378    |
| Plekhs1       | 6.745085791 | 0.0268106031769681   |
| Ndst3         | 6.783797048 | 0.0242160992492355   |
| Gm10800       | 6.788751614 | 0.0447993388804013   |
| Ptprg         | 6.795848329 | 0.0201096854631296   |
| Sertad4       | 6.807782389 | 0.0178881272239994   |
| Atoh8         | 6.832736588 | 0.0164372054186172   |
| Bco1          | 6.876775876 | 0.0236454757593498   |
| Egflam        | 6.889461873 | 0.0371694831514884   |
| Exoc3l2       | 6.889733811 | 0.0238502936450581   |
| Ms4a1         | 6.911972052 | 0.0217168053116722   |
| Meig1         | 6.913386111 | 0.00997760798105226  |
| Megf10        | 6.938717544 | 0.0156756814994069   |
| Eda           | 6.977987412 | 0.0218610797760581   |
| Col28a1       | 6.997119504 | 0.0206528939913282   |
| Mest          | 7.018451249 | 0.0112637085821245   |
| Efemp1        | 7.029882683 | 0.0306575350701789   |
| Ppp1r3c       | 7.048785807 | 0.0196633337996057   |
| Piezo2        | 7.057570131 | 0.00947257118228412  |
| Ccdc154       | 7.09280038  | 0.00820519277443103  |
| Tcim          | 7.094381192 | 0.00635845386759588  |
| Slc4a5        | 7.099296344 | 0.0104059600032008   |

|          |             |                      |
|----------|-------------|----------------------|
| Sult4a1  | 7.108529699 | 0.0110986883616966   |
| Lurap1l  | 7.163783451 | 0.00936308021160274  |
| Steap2   | 7.166410453 | 0.00885270364985505  |
| Odf3l1   | 7.185840338 | 0.00992740838939354  |
| Syt6     | 7.259196986 | 0.00859395257566139  |
| Cd207    | 7.29930933  | 0.00394856976903052  |
| Cthrc1   | 7.328605454 | 0.0065412540267065   |
| Angpt4   | 7.381537662 | 0.00351010840463829  |
| Ecscr    | 7.39437689  | 0.00573070403062073  |
| Pcdhga6  | 7.496312169 | 0.00316953535359036  |
| Pnpla3   | 7.503769255 | 0.00302203887627422  |
| Serinc2  | 7.506160704 | 0.00522570703191609  |
| Sema5a   | 7.512342774 | 0.00785879951325888  |
| Nptx1    | 7.520638054 | 1.17721281265118e-38 |
| Tead2    | 7.586360928 | 0.00558548623886272  |
| Adamts12 | 7.638095402 | 0.00229048292261255  |
| Ngf      | 7.646852464 | 0.00181062522457386  |
| Ambp     | 7.65493183  | 0.00316953535359036  |
| Ogn      | 7.664220843 | 0.00304582066561043  |
| Pard3    | 7.720353446 | 0.00222534675992906  |
| Evc2     | 7.812020565 | 0.00520290554664991  |
| Ptprd    | 7.850156113 | 0.00334117198774621  |
| Myh15    | 7.873790603 | 0.00180155326617801  |
| Nyap2    | 7.978679865 | 0.00102009623413548  |
| Cd209f   | 8.065247998 | 0.00102948419277953  |
| Nox3     | 8.097351533 | 0.000702277265479045 |
| Mapk12   | 8.108134563 | 0.00145577221257284  |
| Spry4    | 8.137404189 | 0.000694467338799743 |
| Rnf183   | 8.151763826 | 6.94352634704524e-07 |
| Klf15    | 8.516538197 | 0.000251159795885856 |
| Sorbs2   | 8.552644061 | 0.000303169825957642 |
| Rab3b    | 8.594528338 | 0.000287234450170215 |
| Cadps    | 8.852887647 | 8.21592394287636e-05 |
| Prl2c2   | 8.985701005 | 8.43177030845696e-05 |

| Enrichment FDR | Genes in list | Total genes | Functional Category                              | Genes                                                                                  |
|----------------|---------------|-------------|--------------------------------------------------|----------------------------------------------------------------------------------------|
| 1.22E-09       | 105           | 2299        | Immune system process                            | CSF1 H2-M2 CD274 PDCD1LG2 CCL6 CCL9 IRF4 IL23A CCR1 IL1B SRC PTX3 TNFSF8 CXCL3 CXCL1   |
| 4.14E-08       | 73            | 1439        | Defense response                                 | CCL6 CCL9 IL33 CCR1 PTX3 CXCL3 CXCL1 KLRK1 HP CCL22 CCL17 CD226 FPR1 LTB4R1 TLR11 EPX  |
| 1.29E-07       | 69            | 1367        | Immune response                                  | H2-M2 CD274 PDCD1LG2 CCL6 CCL9 IL23A CCR1 PTX3 CXCL3 CXCL1 KLRK1 CCL22 CCL17 CD226     |
| 1.79E-07       | 42            | 633         | Regulation of cytokine production                | IL1B KLRK1 CD226 CLEC9A CCR7 CLEC4N IL33 IL6 CD209D FFAR4 LRRC32 KLF4 CD274 PDCD1LG2   |
| 1.79E-07       | 29            | 328         | Leukocyte migration                              | CCL6 CCL9 IL1B CXCL3 CXCL1 KLRK1 F7 CCL22 CCL17 CXCL2 TNFSF14 IL23A CCR1 PLCB1 CSF1 EC |
| 1.92E-07       | 65            | 1281        | Regulation of immune system process              | CSF1 H2-M2 CD274 PDCD1LG2 IL23A KLRK1 F7 CD226 FPR1 TLR11 FPR2 CCR7 TNFSF14 PIM1 C3    |
| 5.66E-07       | 42            | 668         | Inflammatory response                            | CCL6 CCL9 IL33 CCR1 CXCL3 CXCL1 HP CCL22 CCL17 FPR1 LTB4R1 TLR11 FPR2 CXCL2 IL1B FFAR4 |
| 5.66E-07       | 32            | 420         | Positive regulation of cytokine production       | IL1B KLRK1 CD226 CLEC9A CCR7 CLEC4N IL33 CD209D CD274 IRF4 RGCC CLU C3 CD6 IL23A PRG   |
| 7.21E-07       | 21            | 193         | Regulation of cytokine secretion                 | CLEC9A CCR7 CLEC4N IL33 IL1B CD209D FFAR4 LRRC32 CD274 RGCC IL6 FN1 RASGRP1 IL1A SRC   |
| 1.28E-06       | 50            | 916         | Response to cytokine                             | CCL6 CCL9 IL1B CXCL3 CXCL1 CCL22 CCL17 CXCL2 GM4951 F830016B08RIK CSF1 IL6 OCSTAMP (   |
| 1.28E-06       | 22            | 220         | Cytokine secretion                               | CLEC9A CCR7 CLEC4N IL33 IL1B CD209D FFAR4 LRRC32 CD274 RGCC IL6 FN1 RASGRP1 IL1A SRC   |
| 1.61E-06       | 42            | 702         | Cytokine production                              | IL1B KLRK1 CD226 CLEC9A CCR7 CLEC4N IL33 IL6 CD209D FFAR4 LRRC32 KLF4 CD274 PDCD1LG2   |
| 1.94E-06       | 95            | 2378        | Response to external stimulus                    | CD274 PDCD1LG2 CCL6 CCL9 IL33 CCR1 EPHA4 IL1B CXCL3 CXCL1 KLRK1 F7 CCL22 CCL17 CCR7 (  |
| 1.94E-06       | 26            | 313         | Regulation of ERK1 and ERK2 cascade              | CCL6 CCL9 MT3 CCL22 CCL17 SPRY1 KLF4 ALOX15 IL6 FN1 RASGRP1 IL1B SRC GLIPR2 WNK2 SER   |
| 4.14E-06       | 48            | 901         | Positive regulation of immune system process     | CSF1 H2-M2 CD274 PDCD1LG2 IL23A KLRK1 F7 CD226 FPR1 TLR11 FPR2 CCR7 TNFSF14 C3 IL33    |
| 5.02E-06       | 26            | 330         | ERK1 and ERK2 cascade                            | CCL6 CCL9 MT3 CCL22 CCL17 SPRY1 KLF4 ALOX15 IL6 FN1 RASGRP1 IL1B SRC GLIPR2 WNK2 SER   |
| 6.31E-06       | 44            | 802         | Cellular response to cytokine stimulus           | CCL6 CCL9 IL1B CXCL3 CXCL1 CCL22 CCL17 CXCL2 GM4951 F830016B08RIK CSF1 IL6 OCSTAMP (   |
| 6.44E-06       | 7             | 17          | Negative regulation of interleukin-10 production | CD274 PDCD1LG2 IL23A MMP8 PRG2 TNFRSF9 EPX                                             |
| 1.55E-05       | 19            | 199         | Myeloid leukocyte migration                      | CCL6 CCL9 IL1B CXCL3 CXCL1 CCL22 CCL17 CXCL2 IL23A PLCB1 CSF1 EDN1 CCR1 BST1 CCR7 ITG/ |
| 1.55E-05       | 16            | 142         | Granulocyte migration                            | CCL6 CCL9 IL1B CXCL3 CXCL1 CCL22 CCL17 CXCL2 IL23A CSF1 EDN1 BST1 CCR7 ITGA1 EPX IL1A  |

| Gene_Name    | log2FoldChange | padj     |
|--------------|----------------|----------|
| Rnase2a      | -6.300611676   | 0.00011  |
| Muc11        | -4.62862348    | 0.004039 |
| Ccl17        | -4.455951051   | 9.23E-10 |
| Fcrls        | -3.87680687    | 1.94E-06 |
| Ear2         | -3.763389576   | 2.04E-07 |
| Spink3       | -3.597152946   | 0.02841  |
| Ccl12        | -3.385210571   | 0.000572 |
| Muc5b        | -3.316727765   | 0.025305 |
| Gm6484       | -3.251473666   | 0.000702 |
| Car4         | -3.132543003   | 0.000868 |
| Ky           | -3.117689166   | 0.012081 |
| Pitx3        | -3.085692653   | 0.017117 |
| Ccl6         | -2.820046885   | 1.96E-09 |
| 4933422H2ORi | -2.734520962   | 0.000191 |
| AF529169     | -2.726097204   | 0.001878 |
| Clec4b1      | -2.704340644   | 0.004687 |
| Defb1        | -2.681849277   | 0.000112 |
| Slc22a26     | -2.681273855   | 0.001671 |
| Alb          | -2.600133551   | 0.002349 |
| Chi3l3       | -2.599318137   | 0.002124 |
| Gm11710      | -2.589686375   | 6.68E-06 |
| Acot3        | -2.585002632   | 0.002907 |
| Igfbp2       | -2.560605634   | 0.002351 |
| Mmp12        | -2.519956972   | 7.58E-07 |
| Dnaic1       | -2.501747196   | 0.024593 |
| Gm5483       | -2.457090908   | 3.23E-05 |
| Cib3         | -2.456015582   | 0.003776 |
| Mgl2         | -2.446910901   | 0.000519 |
| Cxcl13       | -2.445450984   | 0.000132 |
| Ccl22        | -2.432881539   | 0.001063 |
| G6pc2        | -2.430408825   | 0.008835 |
| Sult1a1      | -2.364210867   | 0.000457 |
| Bhmt         | -2.334209965   | 0.008558 |
| Gm11437      | -2.300075248   | 0.004521 |
| Pf4          | -2.281903331   | 1.51E-09 |
| Cyp4a14      | -2.27182682    | 0.006177 |
| Gbp1         | -2.233784609   | 0.015662 |
| Lyz1         | -2.226246147   | 3.28E-07 |
| Bcl2a1d      | -2.189124131   | 0.001636 |
| Cd207        | -2.188310627   | 0.008376 |
| Sectm1a      | -2.168627984   | 6.43E-06 |
| Ppp1r3c      | -2.168464018   | 0.003582 |
| Mir511       | -2.163716018   | 0.008207 |
| BC089597     | -2.15657828    | 0.001866 |
| Clec4n       | -2.14506616    | 4.21E-06 |
| Siglec1      | -2.133426952   | 0.001171 |



|          |              |          |
|----------|--------------|----------|
| Alox15   | -2.118776379 | 3.00E-05 |
| Slc22a27 | -2.107773045 | 0.011833 |
| Cd177    | -2.063198072 | 1.01E-06 |
| Hyal6    | -2.062962781 | 0.007161 |
| Lyz2     | -2.061063664 | 6.38E-08 |
| Ccl8     | -2.05679965  | 0.044057 |
| Adam33   | -2.026658305 | 0.001505 |
| Gm2061   | -2.024592906 | 0.021159 |
| B3gnt7   | -1.972741613 | 1.46E-10 |
| Chp2     | -1.961442201 | 1.94E-05 |
| Aox3     | -1.958732509 | 0.032702 |
| F13a1    | -1.954352108 | 0.003574 |
| Dcstamp  | -1.944191933 | 0.00296  |
| Tarm1    | -1.923048625 | 5.89E-05 |
| Mtnr1a   | -1.921400686 | 0.001903 |
| Bcl2a1b  | -1.919322719 | 4.89E-05 |
| Hsd17b6  | -1.916694016 | 0.029427 |
| Cyp2c38  | -1.9153614   | 0.001637 |
| Pira6    | -1.904750217 | 0.030812 |
| Bcl2a1a  | -1.894362626 | 0.002593 |
| Cyp2a22  | -1.885664789 | 0.026853 |
| Slco1a4  | -1.870241779 | 0.027244 |
| Enho     | -1.864146662 | 0.016066 |
| Ces1g    | -1.852837708 | 0.000507 |
| Rims3    | -1.842078556 | 0.009575 |
| Pglyrp2  | -1.826891288 | 0.002593 |
| Afm      | -1.823952001 | 0.036911 |
| Lilra5   | -1.808936706 | 0.001288 |
| Cldn1    | -1.808224315 | 0.000772 |
| Amdhd1   | -1.804939146 | 0.042716 |
| Mir122a  | -1.802667012 | 0.024378 |
| Bank1    | -1.802013121 | 3.62E-06 |
| Cyp7a1   | -1.792620597 | 0.002624 |
| Atp6v0d2 | -1.787494556 | 7.96E-05 |
| Irf4     | -1.784366638 | 0.008084 |
| Fgf21    | -1.784314296 | 0.035721 |
| Dlec1    | -1.754796706 | 0.043237 |
| C1qa     | -1.749464631 | 8.47E-06 |
| Dnahc5   | -1.743735866 | 0.03835  |
| Slc16a5  | -1.728767658 | 0.020877 |
| Apoa1    | -1.728763676 | 0.01149  |
| Trem2    | -1.719931081 | 2.62E-08 |
| Aldh1b1  | -1.712306117 | 0.023025 |
| Gm16291  | -1.705953449 | 0.001001 |
| Slc34a2  | -1.703831449 | 0.004201 |
| Esrrb    | -1.694258734 | 0.021744 |
| G0s2     | -1.69344423  | 0.027244 |

|               |              |          |
|---------------|--------------|----------|
| Dsg1c         | -1.691866425 | 0.001711 |
| Gm4952        | -1.691457664 | 0.008691 |
| C1qc          | -1.689161761 | 3.15E-05 |
| Cyp2c44       | -1.686460525 | 0.026853 |
| Fabp7         | -1.684543398 | 0.00296  |
| Abca9         | -1.681986885 | 1.51E-09 |
| Klrb1b        | -1.680826183 | 0.010614 |
| Cyp4f14       | -1.679104707 | 0.03776  |
| Ano5          | -1.67430578  | 0.015021 |
| Col6a6        | -1.668406475 | 0.026387 |
| Fcgr3         | -1.667095214 | 3.09E-06 |
| Ces1b         | -1.661987293 | 0.023476 |
| Adck3         | -1.654381885 | 0.033093 |
| Bhmt2         | -1.651133049 | 0.021122 |
| Tnfrsf13b     | -1.647848451 | 0.006465 |
| Hsd17b13      | -1.647377865 | 0.006332 |
| Hyal5         | -1.645299736 | 0.004235 |
| Ccr5          | -1.63754822  | 0.001211 |
| Pld4          | -1.636550742 | 2.79E-05 |
| Fcgr1         | -1.63474483  | 0.000186 |
| Tlr8          | -1.632009793 | 4.66E-06 |
| Clec4a2       | -1.629478078 | 0.000133 |
| Cd79b         | -1.628241534 | 0.00194  |
| Fmo4          | -1.625029184 | 0.010833 |
| Prhoxnb       | -1.624097429 | 0.047469 |
| Clec12a       | -1.619609212 | 3.55E-05 |
| H2-DMa        | -1.615044146 | 0.000119 |
| Emr1          | -1.61352428  | 1.67E-05 |
| Asgr2         | -1.612532568 | 0.010283 |
| Acot4         | -1.60597925  | 0.004491 |
| Adgb          | -1.605586724 | 6.68E-06 |
| Slc6a13       | -1.604105655 | 0.027318 |
| C1qb          | -1.603786097 | 1.03E-05 |
| Abcb11        | -1.59632778  | 0.042716 |
| B3galt1       | -1.595225457 | 0.025886 |
| Cd19          | -1.592543686 | 0.022154 |
| Msr1          | -1.591369467 | 3.74E-08 |
| Cyp2c68       | -1.591228552 | 0.032702 |
| Abcg3         | -1.589405044 | 1.39E-05 |
| H2-M2         | -1.588912483 | 0.009043 |
| 1700007F19Ril | -1.587510395 | 0.004103 |
| F7            | -1.581474737 | 0.004912 |
| Aqp8          | -1.576286526 | 0.014473 |
| Elovl2        | -1.572343983 | 0.040392 |
| LOC100038941  | -1.557727025 | 0.000187 |
| Amy1          | -1.556086029 | 0.019046 |
| Ces1c         | -1.554637166 | 0.033798 |

|               |              |          |
|---------------|--------------|----------|
| Rab36         | -1.55423804  | 0.00127  |
| Apom          | -1.553983246 | 0.040996 |
| Clec7a        | -1.553642607 | 4.21E-06 |
| 1700040L02Ril | -1.553072462 | 0.013296 |
| Zbtb16        | -1.552602921 | 0.001075 |
| Angptl3       | -1.546951342 | 0.039261 |
| Abca8a        | -1.546575129 | 0.036411 |
| Mag           | -1.542830346 | 0.001991 |
| Serpinc1      | -1.541511255 | 0.028458 |
| Cd180         | -1.539195998 | 9.72E-08 |
| Dmgdh         | -1.53683572  | 0.04882  |
| Ehhadh        | -1.535597367 | 0.049416 |
| Ahsg          | -1.533508616 | 0.025162 |
| Akr1d1        | -1.531721115 | 0.024593 |
| BC048546      | -1.531227408 | 0.045327 |
| Slc16a7       | -1.528008788 | 0.000428 |
| Clec4f        | -1.527470438 | 0.02792  |
| Cyp2c70       | -1.526869396 | 0.048943 |
| Tmem25        | -1.526236878 | 0.004357 |
| F630028O10Ri  | -1.523913787 | 7.97E-08 |
| H2-DMb1       | -1.521020408 | 0.006123 |
| Enpp2         | -1.515459756 | 0.028543 |
| Acot1         | -1.514985283 | 0.008376 |
| Cfp           | -1.514663053 | 1.57E-06 |
| Olf111        | -1.514248158 | 0.021515 |
| Tymp          | -1.505142248 | 0.023871 |
| Agt           | -1.503455069 | 0.036569 |
| Spatc1l       | -1.502666518 | 0.013513 |
| Odf3b         | -1.499923557 | 0.032324 |
| Serpind1      | -1.499895405 | 0.041064 |
| Gamt          | -1.498864793 | 0.018086 |
| Akr1c20       | -1.496435279 | 0.014237 |
| Cd52          | -1.491639861 | 0.00257  |
| Serpinf2      | -1.490871219 | 0.023698 |
| Mmp8          | -1.48751829  | 0.003574 |
| Pzp           | -1.479097415 | 0.048566 |
| Slc30a10      | -1.478532621 | 0.034749 |
| Csf1r         | -1.477422366 | 3.28E-07 |
| Aif1          | -1.477115367 | 5.52E-06 |
| Irf5          | -1.476147494 | 1.00E-06 |
| Gckr          | -1.472528462 | 0.020756 |
| Cysltr1       | -1.468446176 | 0.000231 |
| H2-DMb2       | -1.467523826 | 0.014237 |
| Dpys          | -1.467109002 | 0.037874 |
| Nr1i3         | -1.462233478 | 0.006432 |
| Slc7a8        | -1.460497219 | 4.35E-11 |
| Tm6sf1        | -1.457645308 | 3.28E-07 |

|              |              |          |
|--------------|--------------|----------|
| 4930480G23Ri | -1.456995296 | 0.041992 |
| Sirpb1a      | -1.456372534 | 0.002592 |
| Erbp4        | -1.455952221 | 0.017273 |
| Hfe2         | -1.455004829 | 0.024504 |
| ApoH         | -1.453938115 | 0.038594 |
| Cyp2d37-ps   | -1.451228999 | 0.046726 |
| Tyrobp       | -1.448448972 | 5.29E-07 |
| Fam198a      | -1.44808019  | 0.002091 |
| Ppp1r3b      | -1.446513772 | 0.02039  |
| Mreg         | -1.446243674 | 0.034173 |
| Sdr42e1      | -1.444097039 | 0.029701 |
| Gstm3        | -1.44233363  | 0.027132 |
| Itih1        | -1.442308408 | 0.026333 |
| Alox5ap      | -1.441683868 | 1.75E-05 |
| Vsig4        | -1.441168135 | 0.023871 |
| Ebi3         | -1.438383046 | 0.003776 |
| Adrb3        | -1.434857394 | 0.041386 |
| Cyp2c67      | -1.434606917 | 0.045428 |
| Slamf6       | -1.431619322 | 0.005211 |
| Nxpe5        | -1.42403649  | 0.014237 |
| Rab3il1      | -1.419495665 | 4.10E-07 |
| Gm4788       | -1.417522104 | 0.042716 |
| Lilrb4       | -1.416993275 | 0.000182 |
| Agtr1a       | -1.416779623 | 0.01396  |
| Dppa3        | -1.414002654 | 0.01725  |
| Slc17a1      | -1.403473666 | 0.008376 |
| Cds1         | -1.402731376 | 7.25E-05 |
| B930025P03Ri | -1.400924466 | 0.042658 |
| Cyp4a32      | -1.400208862 | 0.038634 |
| Proz         | -1.399350914 | 0.038093 |
| Tbxas1       | -1.398772512 | 4.23E-06 |
| Btk          | -1.395392971 | 3.15E-05 |
| 1300017J02Ri | -1.394058734 | 0.047777 |
| Lcat         | -1.393446127 | 0.048292 |
| H2-Ab1       | -1.393375502 | 0.001676 |
| Hepacam2     | -1.388533881 | 0.015185 |
| Osgin1       | -1.387058354 | 0.0118   |
| Ctss         | -1.387030731 | 8.88E-05 |
| Vnn3         | -1.386649026 | 0.013216 |
| Qprt         | -1.386621875 | 0.026853 |
| Nlrp3        | -1.38636663  | 2.83E-06 |
| Tbx3         | -1.384784802 | 0.024593 |
| Agxt2        | -1.376567798 | 0.01105  |
| Cpn2         | -1.37147906  | 0.040508 |
| Cd74         | -1.370555649 | 0.001878 |
| H2-Aa        | -1.368620957 | 0.003903 |
| Cyp4a31      | -1.367786127 | 0.013036 |

|              |              |          |
|--------------|--------------|----------|
| Gstm7        | -1.367009263 | 0.029701 |
| Abcc6        | -1.363870927 | 0.043736 |
| Spp2         | -1.361658767 | 0.046731 |
| Arl11        | -1.360917293 | 0.000215 |
| Vwce         | -1.360424151 | 0.041992 |
| Hrg          | -1.358842775 | 0.042716 |
| Al504432     | -1.356327292 | 0.033093 |
| F13b         | -1.355931579 | 0.042716 |
| Tlr7         | -1.35580269  | 0.001428 |
| Icos         | -1.355428378 | 0.008313 |
| Meiob        | -1.351478348 | 0.042534 |
| C8a          | -1.351005229 | 0.044691 |
| H2-Eb1       | -1.350966524 | 0.003605 |
| F2           | -1.350080312 | 0.041386 |
| Pon1         | -1.348810717 | 0.047807 |
| Itgb2        | -1.34727411  | 4.21E-06 |
| Cd79a        | -1.343196681 | 0.028769 |
| Tfec         | -1.34254219  | 6.52E-06 |
| ApoE         | -1.3420317   | 0.033093 |
| Vipr1        | -1.339192114 | 0.01002  |
| Masp2        | -1.336227873 | 0.039387 |
| Nckap1l      | -1.332088313 | 6.99E-06 |
| F10          | -1.332072812 | 0.026718 |
| Gm5150       | -1.331304228 | 0.000245 |
| Fmo5         | -1.325808507 | 0.046917 |
| 2010003K11Ri | -1.32532162  | 0.031042 |
| Cd163        | -1.323295042 | 0.000299 |
| Chrm3        | -1.319438185 | 0.031004 |
| Spata2l      | -1.319036177 | 0.026853 |
| Gm2a         | -1.317964239 | 0.000763 |
| Vtn          | -1.317513964 | 0.046726 |
| Phf11a       | -1.316653526 | 0.018486 |
| Fcer1g       | -1.315107013 | 3.89E-05 |
| Zfp750       | -1.314593323 | 0.013489 |
| Azgp1        | -1.314316192 | 0.046258 |
| Snurf        | -1.314275217 | 0.01585  |
| Cd36         | -1.312467195 | 0.0001   |
| Slc10a5      | -1.310942494 | 0.033668 |
| Pla2g12b     | -1.308214147 | 0.033183 |
| Nlrp6        | -1.307382836 | 0.048244 |
| P2ry13       | -1.307141736 | 2.20E-08 |
| Rnase6       | -1.299371985 | 0.016755 |
| Ccr1         | -1.299122322 | 0.001025 |
| Mug2         | -1.298093069 | 0.02167  |
| P2ry12       | -1.297280217 | 8.38E-08 |
| Myo1g        | -1.296955233 | 0.003958 |
| Mfsd7c       | -1.294873621 | 1.95E-05 |

|              |              |          |
|--------------|--------------|----------|
| Fads6        | -1.292623204 | 0.017379 |
| Fgd2         | -1.289629363 | 2.20E-08 |
| Cd69         | -1.285114617 | 0.042796 |
| Laptm5       | -1.284807162 | 1.99E-06 |
| Rassf4       | -1.284469493 | 6.52E-06 |
| Tspan32      | -1.283817156 | 0.028458 |
| Prlr         | -1.281378931 | 0.03792  |
| Fcgr2b       | -1.281094981 | 0.000139 |
| Slc26a1      | -1.277034032 | 0.037293 |
| Itih2        | -1.273091903 | 0.035924 |
| Mst1         | -1.272552471 | 0.029522 |
| Kctd12       | -1.268785807 | 2.37E-05 |
| Spic         | -1.265111392 | 0.001901 |
| Foxa3        | -1.264884296 | 0.025219 |
| Sfpi1        | -1.264650326 | 3.28E-07 |
| Smlr1        | -1.263453714 | 0.024747 |
| Itgal        | -1.263203594 | 6.05E-05 |
| Abcd2        | -1.260982612 | 0.002116 |
| 1810033B17Ri | -1.260131815 | 0.010293 |
| Rgs18        | -1.25918895  | 0.004417 |
| Klra2        | -1.25712237  | 1.57E-06 |
| Rnf144b      | -1.25553687  | 0.005969 |
| Slfm1        | -1.252172114 | 0.012081 |
| Clec4a3      | -1.251967602 | 0.002029 |
| Dock2        | -1.250440213 | 0.000282 |
| Gdf10        | -1.247797394 | 0.014473 |
| Cideb        | -1.246398578 | 0.032594 |
| Tnxb         | -1.245859822 | 0.037657 |
| Tmem37       | -1.245549889 | 0.019089 |
| Acat3        | -1.245542943 | 0.049018 |
| Tmem30b      | -1.241809607 | 0.026529 |
| Crot         | -1.241638835 | 0.027155 |
| Slc17a4      | -1.2412385   | 0.00559  |
| Nr1i2        | -1.239287647 | 0.036225 |
| Hs3st3b1     | -1.238688777 | 0.021668 |
| Sepp1        | -1.236629371 | 0.034761 |
| C5ar1        | -1.234925228 | 0.00013  |
| Srrm4        | -1.2344078   | 0.032185 |
| Ccl24        | -1.233975356 | 0.000235 |
| Acox2        | -1.233056977 | 0.035773 |
| 1300002K09Ri | -1.229483578 | 0.025713 |
| Fcrla        | -1.228990487 | 0.048244 |
| Ccdc69       | -1.22685329  | 0.024352 |
| Lrmp         | -1.226706964 | 0.000236 |
| 1810011H11Ri | -1.226461548 | 5.16E-06 |
| Itga8        | -1.223006733 | 0.00562  |
| D630039A03Ri | -1.219790348 | 0.003397 |

|               |              |          |
|---------------|--------------|----------|
| Lair1         | -1.219319886 | 8.64E-05 |
| AF251705      | -1.217649039 | 4.21E-06 |
| Vmo1          | -1.212864508 | 0.042826 |
| Mfsd6l        | -1.212484499 | 0.027369 |
| Gpr65         | -1.212257156 | 0.005426 |
| Tppp          | -1.212125179 | 0.015449 |
| Med12l        | -1.20654658  | 0.01149  |
| Cd300ld       | -1.202378108 | 3.75E-05 |
| C4bp          | -1.199729567 | 0.033019 |
| Adamdec1      | -1.199670501 | 8.02E-05 |
| Gpld1         | -1.197615516 | 0.031286 |
| Amt           | -1.197345431 | 0.028951 |
| Atf5          | -1.194868105 | 0.012397 |
| Cyth4         | -1.194741661 | 0.001115 |
| Ugt1a6b       | -1.194474218 | 0.03945  |
| Itgax         | -1.1929123   | 0.007621 |
| Asb2          | -1.191466293 | 0.009886 |
| Cxcl12        | -1.18574521  | 0.033185 |
| Cd200r4       | -1.179452702 | 0.002079 |
| Tmie          | -1.174112274 | 0.038079 |
| Gdf2          | -1.173770867 | 0.000202 |
| Aldh1a7       | -1.173761045 | 0.040392 |
| P2ry14        | -1.170766466 | 1.94E-06 |
| Gm11837       | -1.169432375 | 0.045305 |
| Faah          | -1.167271252 | 0.031399 |
| 5031425F14Ril | -1.166326672 | 0.005854 |
| C3            | -1.165511473 | 0.049416 |
| Spata22       | -1.162540143 | 0.025145 |
| Sash3         | -1.157211688 | 0.002612 |
| Coro1a        | -1.156382886 | 6.13E-05 |
| Folr2         | -1.156171257 | 0.038762 |
| Mme           | -1.154169099 | 0.01002  |
| Syt1          | -1.153098186 | 0.046726 |
| Pctp          | -1.151324432 | 0.023225 |
| Fpgs          | -1.150744651 | 0.02281  |
| Slc9a9        | -1.146955894 | 4.20E-06 |
| Habp2         | -1.146855563 | 0.035145 |
| Olfm1         | -1.145991861 | 0.040884 |
| Abcb4         | -1.145859678 | 0.042716 |
| Oit3          | -1.145541697 | 0.017362 |
| Mrc1          | -1.144360701 | 0.003776 |
| Cd48          | -1.138605446 | 0.00085  |
| Epsti1        | -1.137757361 | 0.000226 |
| Fbln5         | -1.137130929 | 0.003429 |
| Pik3cg        | -1.135623031 | 0.001647 |
| Clec1b        | -1.132430096 | 0.004491 |
| C1ra          | -1.126875825 | 0.049679 |

|               |              |          |
|---------------|--------------|----------|
| Rorc          | -1.12602633  | 0.026217 |
| Agmo          | -1.121999748 | 0.04707  |
| Tnfrsf25      | -1.121050946 | 0.013296 |
| Fam46c        | -1.119529897 | 0.041602 |
| Fermt3        | -1.119332245 | 3.85E-07 |
| Nfam1         | -1.118554821 | 3.28E-07 |
| Mtfp1         | -1.115568001 | 0.049679 |
| Lcp1          | -1.115521812 | 0.000221 |
| C3ar1         | -1.115078402 | 0.001811 |
| Chdh          | -1.114478484 | 0.045959 |
| Al662270      | -1.113624247 | 0.00011  |
| Bdh1          | -1.113499829 | 0.048158 |
| Arhgap9       | -1.113425863 | 1.59E-05 |
| F630111L10Ril | -1.111635853 | 2.41E-05 |
| Fam78a        | -1.109776212 | 0.000226 |
| Mpeg1         | -1.109490365 | 7.99E-08 |
| Cfi           | -1.108636099 | 0.040299 |
| Cybb          | -1.107086434 | 0.000132 |
| Cd86          | -1.105109524 | 0.003299 |
| Clpx          | -1.10479865  | 0.01002  |
| Dock10        | -1.100134595 | 0.00324  |
| Wdfy4         | -1.099717568 | 0.011402 |
| Gpr171        | -1.098259443 | 0.025381 |
| Pik3r6        | -1.095515381 | 0.002263 |
| Ccl9          | -1.094933906 | 3.28E-07 |
| Plbd1         | -1.093630778 | 0.00296  |
| Cx3cr1        | -1.092600861 | 4.88E-05 |
| Sntb1         | -1.09197764  | 0.049899 |
| Plcb2         | -1.090893412 | 6.68E-06 |
| Trpv2         | -1.089603245 | 0.000475 |
| Masp1         | -1.088182299 | 0.037618 |
| Adap2         | -1.086939703 | 0.003052 |
| Tnfaip8l2     | -1.086406472 | 4.20E-06 |
| Tlr9          | -1.085802093 | 0.01091  |
| Steap3        | -1.084715273 | 0.019159 |
| Ptpro         | -1.083416902 | 0.000592 |
| Olfml1        | -1.082386294 | 0.020797 |
| Tlr12         | -1.082238969 | 0.011488 |
| Clec5a        | -1.0811707   | 0.031004 |
| Ikzf1         | -1.078298695 | 0.001388 |
| Scimp         | -1.0781301   | 0.002224 |
| Trem14        | -1.077347784 | 0.016629 |
| Amica1        | -1.074439695 | 0.025362 |
| Pbld1         | -1.069572681 | 0.044778 |
| Lst1          | -1.067705486 | 0.029701 |
| Gna15         | -1.065806515 | 5.11E-05 |
| Arhgap15      | -1.064546672 | 0.004554 |



|              |              |          |
|--------------|--------------|----------|
| A230050P20Ri | -1.063823086 | 0.01847  |
| Sla          | -1.062830383 | 0.000421 |
| Inca1        | -1.062802222 | 0.033231 |
| Hoga1        | -1.060100329 | 0.042716 |
| Rasal3       | -1.059335686 | 0.006067 |
| Emb          | -1.058790622 | 0.005895 |
| Immmp2l      | -1.058774555 | 0.009043 |
| Abca8b       | -1.055496728 | 0.037267 |
| Clec4a1      | -1.055423982 | 0.014099 |
| Gpr17        | -1.054727891 | 0.039261 |
| Fam196b      | -1.054608668 | 0.006183 |
| Adam11       | -1.050030056 | 0.027869 |
| Arhgap4      | -1.047051252 | 3.74E-08 |
| Rilp         | -1.045035976 | 0.046525 |
| Gbgt1        | -1.044979999 | 0.002155 |
| Tcf21        | -1.044523154 | 0.01002  |
| Rab32        | -1.043063737 | 0.000323 |
| Psen2        | -1.042559369 | 0.048244 |
| Gulo         | -1.04200616  | 0.038648 |
| H2-Q1        | -1.041751776 | 0.010283 |
| Alad         | -1.034179466 | 0.013655 |
| Neb          | -1.02984924  | 0.04495  |
| Hcls1        | -1.02864262  | 3.38E-05 |
| 1700012D14Ri | -1.026606563 | 0.003401 |
| Faim3        | -1.025045976 | 0.032647 |
| Lpl          | -1.024221931 | 0.000603 |
| Inhbe        | -1.023140887 | 0.022929 |
| Ticam2       | -1.019377267 | 0.000307 |
| Clec10a      | -1.018923104 | 0.031848 |
| AU022793     | -1.018904464 | 0.008167 |
| Hk3          | -1.016591949 | 0.004367 |
| Clec2i       | -1.016209252 | 0.019686 |
| Gp49a        | -1.015131809 | 0.01002  |
| Arhgap30     | -1.010555496 | 5.83E-05 |
| Card9        | -1.009852791 | 0.002149 |
| Lrrc25       | -1.007597846 | 0.002592 |
| A530032D15Ri | -1.002052606 | 0.026415 |
| Mfsd7a       | -1.001874496 | 0.004967 |
| Lrrc3        | -1.001248355 | 0.042716 |
| Map1b        | 1.002017493  | 0.049416 |
| Slc16a3      | 1.004993121  | 0.022131 |
| Dusp4        | 1.013095658  | 0.000502 |
| Mpp2         | 1.014259537  | 0.020585 |
| Dusp14       | 1.024507249  | 0.016263 |
| Prss12       | 1.026832928  | 0.025408 |
| 1700125H03Ri | 1.049448923  | 0.035186 |
| Chst11       | 1.057622074  | 0.016845 |

|               |             |          |
|---------------|-------------|----------|
| Bfsp1         | 1.061499811 | 0.039775 |
| Zfp365        | 1.06841489  | 0.002124 |
| Cthrc1        | 1.07447159  | 0.021515 |
| Jag1          | 1.074660022 | 0.042769 |
| Cox4i2        | 1.07574114  | 0.006256 |
| Csgalnact1    | 1.079760935 | 0.008741 |
| Rgs4          | 1.096174694 | 0.033093 |
| Tmem200a      | 1.105521561 | 0.043498 |
| Tnfrsf22      | 1.109990091 | 0.000926 |
| Gjb4          | 1.112612554 | 0.014647 |
| Dnahc10       | 1.113483559 | 0.008751 |
| Ano4          | 1.121375216 | 0.00194  |
| Nt5e          | 1.126805614 | 0.004005 |
| Cubn          | 1.130228603 | 0.040367 |
| Fosl1         | 1.144478116 | 0.008376 |
| Tnfaip6       | 1.155584823 | 0.033231 |
| Adamts4       | 1.169591542 | 3.55E-05 |
| Inhba         | 1.208117501 | 0.014237 |
| Fam71f2       | 1.212658872 | 0.008754 |
| Tnfrsf23      | 1.217490217 | 1.20E-05 |
| Stc1          | 1.218295016 | 0.041386 |
| Meox1         | 1.22617395  | 1.95E-05 |
| Crlf1         | 1.234425044 | 0.043382 |
| Gm12505       | 1.242061221 | 0.000686 |
| Abcb1a        | 1.26173947  | 0.022955 |
| Rab15         | 1.286280751 | 0.000443 |
| Areg          | 1.295513028 | 0.003242 |
| Ptpn          | 1.3162725   | 0.025704 |
| Piezo2        | 1.318922561 | 0.023871 |
| Mcpt1         | 1.323246307 | 0.029249 |
| Psg22         | 1.343555947 | 0.044944 |
| Apol8         | 1.347616129 | 0.042658 |
| Nav3          | 1.355382932 | 0.045782 |
| Foxc2         | 1.359034039 | 0.000592 |
| 7530420F21Ril | 1.369809598 | 0.033231 |
| Ptgs2         | 1.439398642 | 0.001799 |
| Esm1          | 1.44224475  | 0.025408 |
| Npr3          | 1.542496094 | 0.038762 |
| Lrrc10b       | 1.616381191 | 0.009776 |
| Sh3gl3        | 1.634393219 | 0.025145 |
| Vgf           | 1.666178427 | 0.041992 |
| Tkt1          | 1.679711699 | 0.007367 |
| Nell2         | 1.696023875 | 0.021515 |
| Clvs1         | 1.770366959 | 0.048505 |
| Stmn4         | 1.776608881 | 0.000307 |
| Anks1b        | 1.783108455 | 0.031165 |
| 9530059O14Ri  | 1.788725326 | 0.035773 |

|               |             |          |
|---------------|-------------|----------|
| Tnni1         | 1.847844247 | 0.009578 |
| Lrrc3b        | 1.879506359 | 0.021159 |
| Lrrc7         | 1.918528371 | 0.042881 |
| Fam19a1       | 2.013613918 | 0.020756 |
| Ptpn5         | 2.193401922 | 0.002117 |
| 1700123L14Ril | 2.244908836 | 0.01191  |
| Kcnc2         | 2.358299551 | 0.024504 |
| Hey1          | 2.430097521 | 0.013656 |
| Stmn2         | 2.430225425 | 0.043736 |
| Hist2h2aa2    | 2.46344576  | 2.76E-05 |
| Aldh1a3       | 2.550888301 | 0.002626 |
| Pthlh         | 2.694356144 | 0.007202 |
| Gpr149        | 2.864417062 | 0.032319 |
| Npy           | 2.870673498 | 0.005519 |
| 4930474M22R   | 2.886646966 | 0.034173 |
| Slitrk6       | 3.545459842 | 0.002423 |
| Crabp1        | 4.858974746 | 0.00527  |

| Enrichment FDR | Genes in list | Total genes | Functional Category                          | Genes                                                                           |
|----------------|---------------|-------------|----------------------------------------------|---------------------------------------------------------------------------------|
| 4.25E-11       | 38            | 1367        | Immune response                              | CCL8 H2-M2 CCL6 CD180 CXCL13 PF4 CD19 CCL22 CCL17 CCL12 TLR8 CD79B CCR5 PGLYRP2 |
| 7.97E-10       | 47            | 2299        | Immune system process                        | CCL8 TNFRSF13B H2-M2 CCL6 IRF4 CD180 CXCL13 PF4 CD19 F7 CCL22 CCL17 CCL12 TLR8  |
| 3.66E-08       | 34            | 1439        | Defense response                             | CCL8 CCL6 CXCL13 PF4 CCL22 CCL17 CCL12 TLR8 LYZ1 LYZ2 CCR5 PGLYRP2 TREM2 CLEC4N |
| 1.12E-07       | 23            | 703         | Innate immune response                       | CCL8 CCL6 CCL22 CCL17 CCL12 TLR8 TREM2 CLEC4N KLRB1B CFP FCGR1 CD180 CLDN1      |
| 2.04E-07       | 43            | 2378        | Response to external stimulus                | CCL8 CCL6 CD180 CXCL13 PF4 F7 CCL22 CCL17 CCL12 TLR8 LYZ1 LYZ2 CCR5 PGLYRP2 TF  |
| 1.30E-06       | 9             | 85          | Chemokine-mediated signaling pathway         | CCL8 CCL6 CXCL13 PF4 CCL22 CCL17 CCL12 TREM2 CCR5                               |
| 1.31E-06       | 29            | 1281        | Regulation of immune system process          | TNFRSF13B H2-M2 CD19 F7 TLR8 CD79B PGLYRP2 DCSTAMP TARM1 ZBTB16 KLRB1B B        |
| 2.18E-06       | 9             | 93          | Long-chain fatty acid metabolic process      | CYP2C38 CYP2C70 CYP2C68 CYP2A22 ALOX15 ACOT3 ACOT1 CYP4F14 ACOT4                |
| 2.31E-06       | 9             | 96          | Response to chemokine                        | CCL8 CCL6 CXCL13 PF4 CCL22 CCL17 CCL12 TREM2 CCR5                               |
| 2.31E-06       | 9             | 96          | Cellular response to chemokine               | CCL8 CCL6 CXCL13 PF4 CCL22 CCL17 CCL12 TREM2 CCR5                               |
| 2.85E-06       | 20            | 668         | Inflammatory response                        | CCL8 CCL6 CXCL13 PF4 CCL22 CCL17 CCL12 CCR5 TARM1 CD180 SERPINC1 APOA1 TLR8     |
| 8.23E-06       | 27            | 1258        | Lipid metabolic process                      | ACOT3 ELOVL2 ENPP2 EHHADH CYP7A1 APOA1 CYP2C38 AKR1D1 ACOT4 CES1G CES1C         |
| 1.65E-05       | 22            | 901         | Positive regulation of immune system process | H2-M2 CD19 F7 TLR8 CD79B DCSTAMP BCL2A1D CFP TREM2 C1QA C1QC C1QB IGF1BP2       |
| 1.66E-05       | 23            | 987         | Response to external biotic stimulus         | CD180 CXCL13 PF4 TLR8 LYZ1 LYZ2 PGLYRP2 TREM2 CLEC4N CLDN1 CD207 DEFB1 CCR1     |
| 1.66E-05       | 23            | 984         | Response to other organism                   | CD180 CXCL13 PF4 TLR8 LYZ1 LYZ2 PGLYRP2 TREM2 CLEC4N CLDN1 CD207 DEFB1 CCR1     |
| 2.78E-05       | 23            | 1020        | Response to biotic stimulus                  | CD180 CXCL13 PF4 TLR8 LYZ1 LYZ2 PGLYRP2 TREM2 CLEC4N CLDN1 CD207 DEFB1 CCR1     |
| 3.99E-05       | 35            | 2138        | Positive regulation of response to stimulus  | CCL8 G0S2 H2-M2 CCL6 CD180 CD19 F7 CCL22 CCL17 CCL12 TLR8 CD79B CLEC4N TARM1    |
| 6.98E-05       | 18            | 693         | Response to bacterium                        | CD180 CXCL13 PF4 LYZ1 LYZ2 PGLYRP2 TREM2 CLDN1 DEFB1 CCR5 BANK1 CD79B CES1      |
| 6.98E-05       | 12            | 301         | Lipid catabolic process                      | ENPP2 EHHADH APOA1 CES1G CES1C CES1B CYP7A1 CYP4F14 ANGPTL3 FGF21 AKR1D1        |
| 8.63E-05       | 8             | 118         | Neutrophil migration                         | CCL8 CCL6 CXCL13 PF4 CCL22 CCL17 CCL12 CD177                                    |

| Enrichment FDR | Genes in list | Total genes | Functional Category                         | Genes                                                                            |
|----------------|---------------|-------------|---------------------------------------------|----------------------------------------------------------------------------------|
| 2.19E-14       | 46            | 941         | blood vessel development                    | Prl2c2/Hes1/Adgrf5/Foxs1/Tead2/Sema5a/Ecscr/Angpt4/Ephb4/Adam12/Col18a1/Foxc1/   |
| 1.15E-13       | 46            | 95          | vasculature development                     | Prl2c2/Hes1/Adgrf5/Foxs1/Tead2/Sema5a/Ecscr/Angpt4/Ephb4/Adam12/Col18a1/Foxc1/   |
| 1.48E-12       | 40            | 80          | blood vessel morphogenesis                  | Prl2c2/Hes1/Adgrf5/Tead2/Sema5a/Ecscr/Angpt4/Ephb4/Adam12/Col18a1/Foxc1/Notch4   |
| 1.92E-12       | 48            | 89          | tube morphogenesis                          | Prl2c2/Hes1/Adgrf5/Adamts12/Tead2/Sema5a/Ecscr/Angpt4/Cthrc1/Gata3/Ephb4/Adam1   |
| 1.27E-11       | 35            | 169         | angiogenesis                                | Prl2c2/Sema5a/Ecscr/Angpt4/Ephb4/Adam12/Col18a1/Foxc1/Notch4/Hmga2/Amotl2/Plc    |
| 3.78E-10       | 25            | 100         | regulation of angiogenesis                  | Prl2c2/Sema5a/Ecscr/Angpt4/Adam12/Foxc1/Notch4/Hmga2/Tgfb2/Fgf1/Rapgef3/Ccr3/E   |
| 4.99E-10       | 26            | 66          | regulation of vasculature development       | Prl2c2/Sema5a/Ecscr/Angpt4/Ephb4/Adam12/Foxc1/Notch4/Hmga2/Tgfb2/Fgf1/Rapgef3,   |
| 7.86E-09       | 21            | 168         | extracellular matrix organization           | Adamts12/Sema5a/Fbln1/Pxdn/Col18a1/Gpm6b/Foxc1/Loxl1/Tgfb2/Lamb1/Col5a1/Smpd     |
| 8.56E-09       | 21            | 105         | extracellular structure organization        | Adamts12/Sema5a/Fbln1/Pxdn/Col18a1/Gpm6b/Foxc1/Loxl1/Tgfb2/Lamb1/Col5a1/Smpd     |
| 3.00E-08       | 43            | 26          | epithelium development                      | Klf15/Hes1/Pard3/Adamts12/Tead2/Clic5/Sema5a/Cthrc1/Gata3/Gas1/Slc4a5/Atoh8/Ret/ |
| 5.15E-08       | 35            | 727         | cell morphogenesis involved in differentiat | Nptx1/Hes1/Ptprd/Pard3/Ngf/Clic5/Sema5a/Gata3/Ephb4/Gas1/Fbln1/Ret/Etv4/Col18a1/ |
| 6.36E-08       | 35            | 575         | regulation of cell adhesion                 | Hes1/Sema5a/Gata3/Ephb4/Megf10/Fbln1/Ret/Zdhc2/Gpm6b/Notch4/Camsap3/Tnc/Tg       |
| 9.07E-08       | 34            | 88          | cell-cell adhesion                          | Hes1/Ptprd/Pard3/Gata3/Ephb4/Megf10/Ret/Zdhc2/Igsf11/Notch4/Pcdh18/Camsap3/Nr    |
| 1.40E-07       | 15            | 17          | Notch signaling pathway                     | Sorbs2/Hes1/Angpt4/Tcim/Enho/Foxc1/Notch4/Dner/Chac1/Tgfb2/Jag2/Epn2/Bcl6/Jag1/  |
| 1.70E-07       | 39            | 217         | cation transport                            | Rab3b/Hes1/Atp1b1/Ngf/Heph/Fcrl5/Tfr2/Syt6/Steap2/Piezo2/Steap4/Jph2/Kcnk12/Kcnc |
| 1.97E-07       | 11            | 507         | regulation of Notch signaling pathway       | Hes1/Tcim/Enho/Notch4/Chac1/Tgfb2/Jag2/Epn2/Bcl6/Jag1/Gdpc5                      |
| 2.24E-07       | 17            | 42          | positive regulation of vasculature developr | Prl2c2/Sema5a/Angpt4/Ephb4/Adam12/Notch4/Hmga2/Fgf1/Rapgef3/Ccr3/Kdr/Serpine1,   |
| 2.79E-07       | 39            | 59          | regulation of cell migration                | Prl2c2/Sema5a/Angpt4/Gata3/Dpep1/Fbln1/Atoh8/Ret/Mgat3/Col18a1/Camsap3/Lgr6/Cc   |
| 3.09E-07       | 16            | 742         | positive regulation of angiogenesis         | Prl2c2/Sema5a/Angpt4/Adam12/Notch4/Hmga2/Fgf1/Rapgef3/Ccr3/Kdr/Serpine1/Itgb3/   |
| 4.09E-07       | 37            | 341         | animal organ morphogenesis                  | Hes1/Tead2/Clic5/Cthrc1/Gata3/Ephb4/Gas1/Ccdc154/Gdf11/Ankrd6/Fjx1/Cpe/Etv4/Grer |

| Enrichment FDR | Genes in list | Total genes | Functional Category                              | Genes                                   |
|----------------|---------------|-------------|--------------------------------------------------|-----------------------------------------|
| 1.54E-05       | 2             | 1117        | hyaluronan cable assembly                        | Bmp7/Has3                               |
| 1.54E-05       | 2             | 809         | regulation of hyaluronan cable assembly          | Bmp7/Has3                               |
| 1.54E-05       | 2             | 674         | positive regulation of hyaluronan cable assembly | Bmp7/Has3                               |
| 0.000279941    | 7             | 538         | tissue morphogenesis                             | Irx2/Pthlh/Aldh1a3/Hey1/Bmp7/Tnni1/Stc1 |
| 0.000459346    | 2             | 68          | morphogenesis of an epithelial bud               | Pthlh/Bmp7                              |
| 0.00045992     | 6             | 781         | regulation of hormone levels                     | Crabp1/Aldh1a3/Vgf/Il11/Nell2/Gipr      |
| 0.000461433    | 3             | 363         | nephron morphogenesis                            | Irx2/Hey1/Bmp7                          |
| 0.000627044    | 4             | 187         | osteoblast differentiation                       | Twist2/Pthlh/Hey1/Bmp7                  |
| 0.000683528    | 2             | 963         | osteoblast development                           | Pthlh/Hey1                              |
| 0.000840295    | 3             | 699         | kidney morphogenesis                             | Irx2/Hey1/Bmp7                          |
| 0.000958094    | 5             | 118         | ossification                                     | Twist2/Pthlh/Hey1/Bmp7/Stc1             |
| 0.001049372    | 2             | 432         | reflex                                           | Slitrk6/Aldh1a3                         |
| 0.001152645    | 2             | 336         | endocardial cushion formation                    | Hey1/Bmp7                               |
| 0.001152645    | 2             | 107         | morphogenesis of an epithelial fold              | Pthlh/Bmp7                              |
| 0.00116311     | 4             | 50          | skeletal system morphogenesis                    | Twist2/Pthlh/Bmp7/Stc1                  |
| 0.001260601    | 2             | 58          | retinoic acid metabolic process                  | Crabp1/Aldh1a3                          |
| 0.001490478    | 2             | 684         | startle response                                 | Slitrk6/Grin2a                          |
| 0.001490478    | 2             | 89          | embryonic camera-type eye morphogenesis          | Aldh1a3/Bmp7                            |
| 0.001617147    | 4             | 172         | regulation of synaptic plasticity                | Cbln1/Vgf/Ptpn5/Grin2a                  |
| 0.001738837    | 2             | 314         | monovalent inorganic anion homeostasis           | Pthlh/Stc1                              |

# Supplemental Figure 1

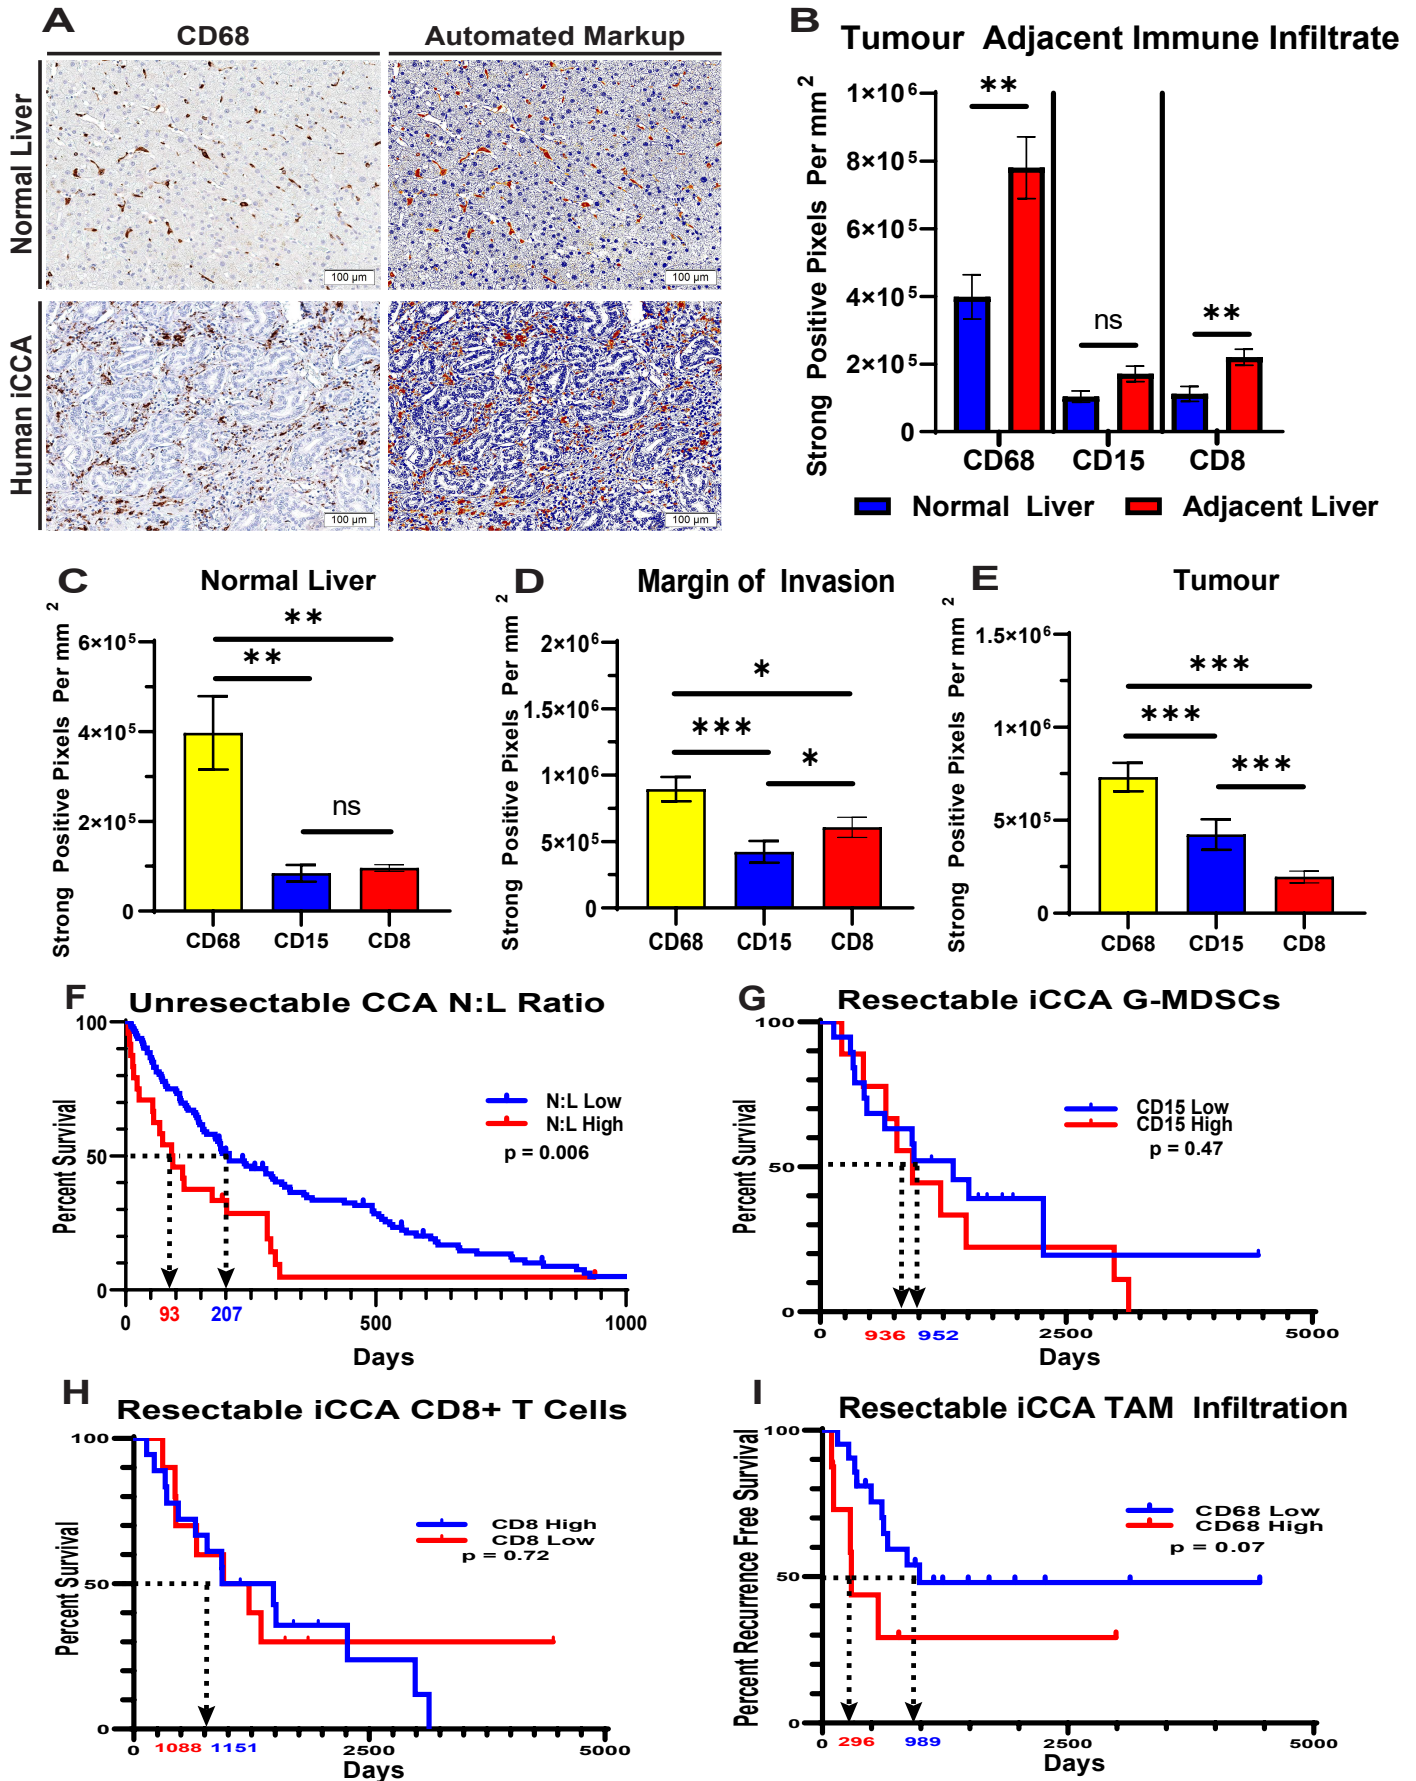

## Supplemental Figure 2

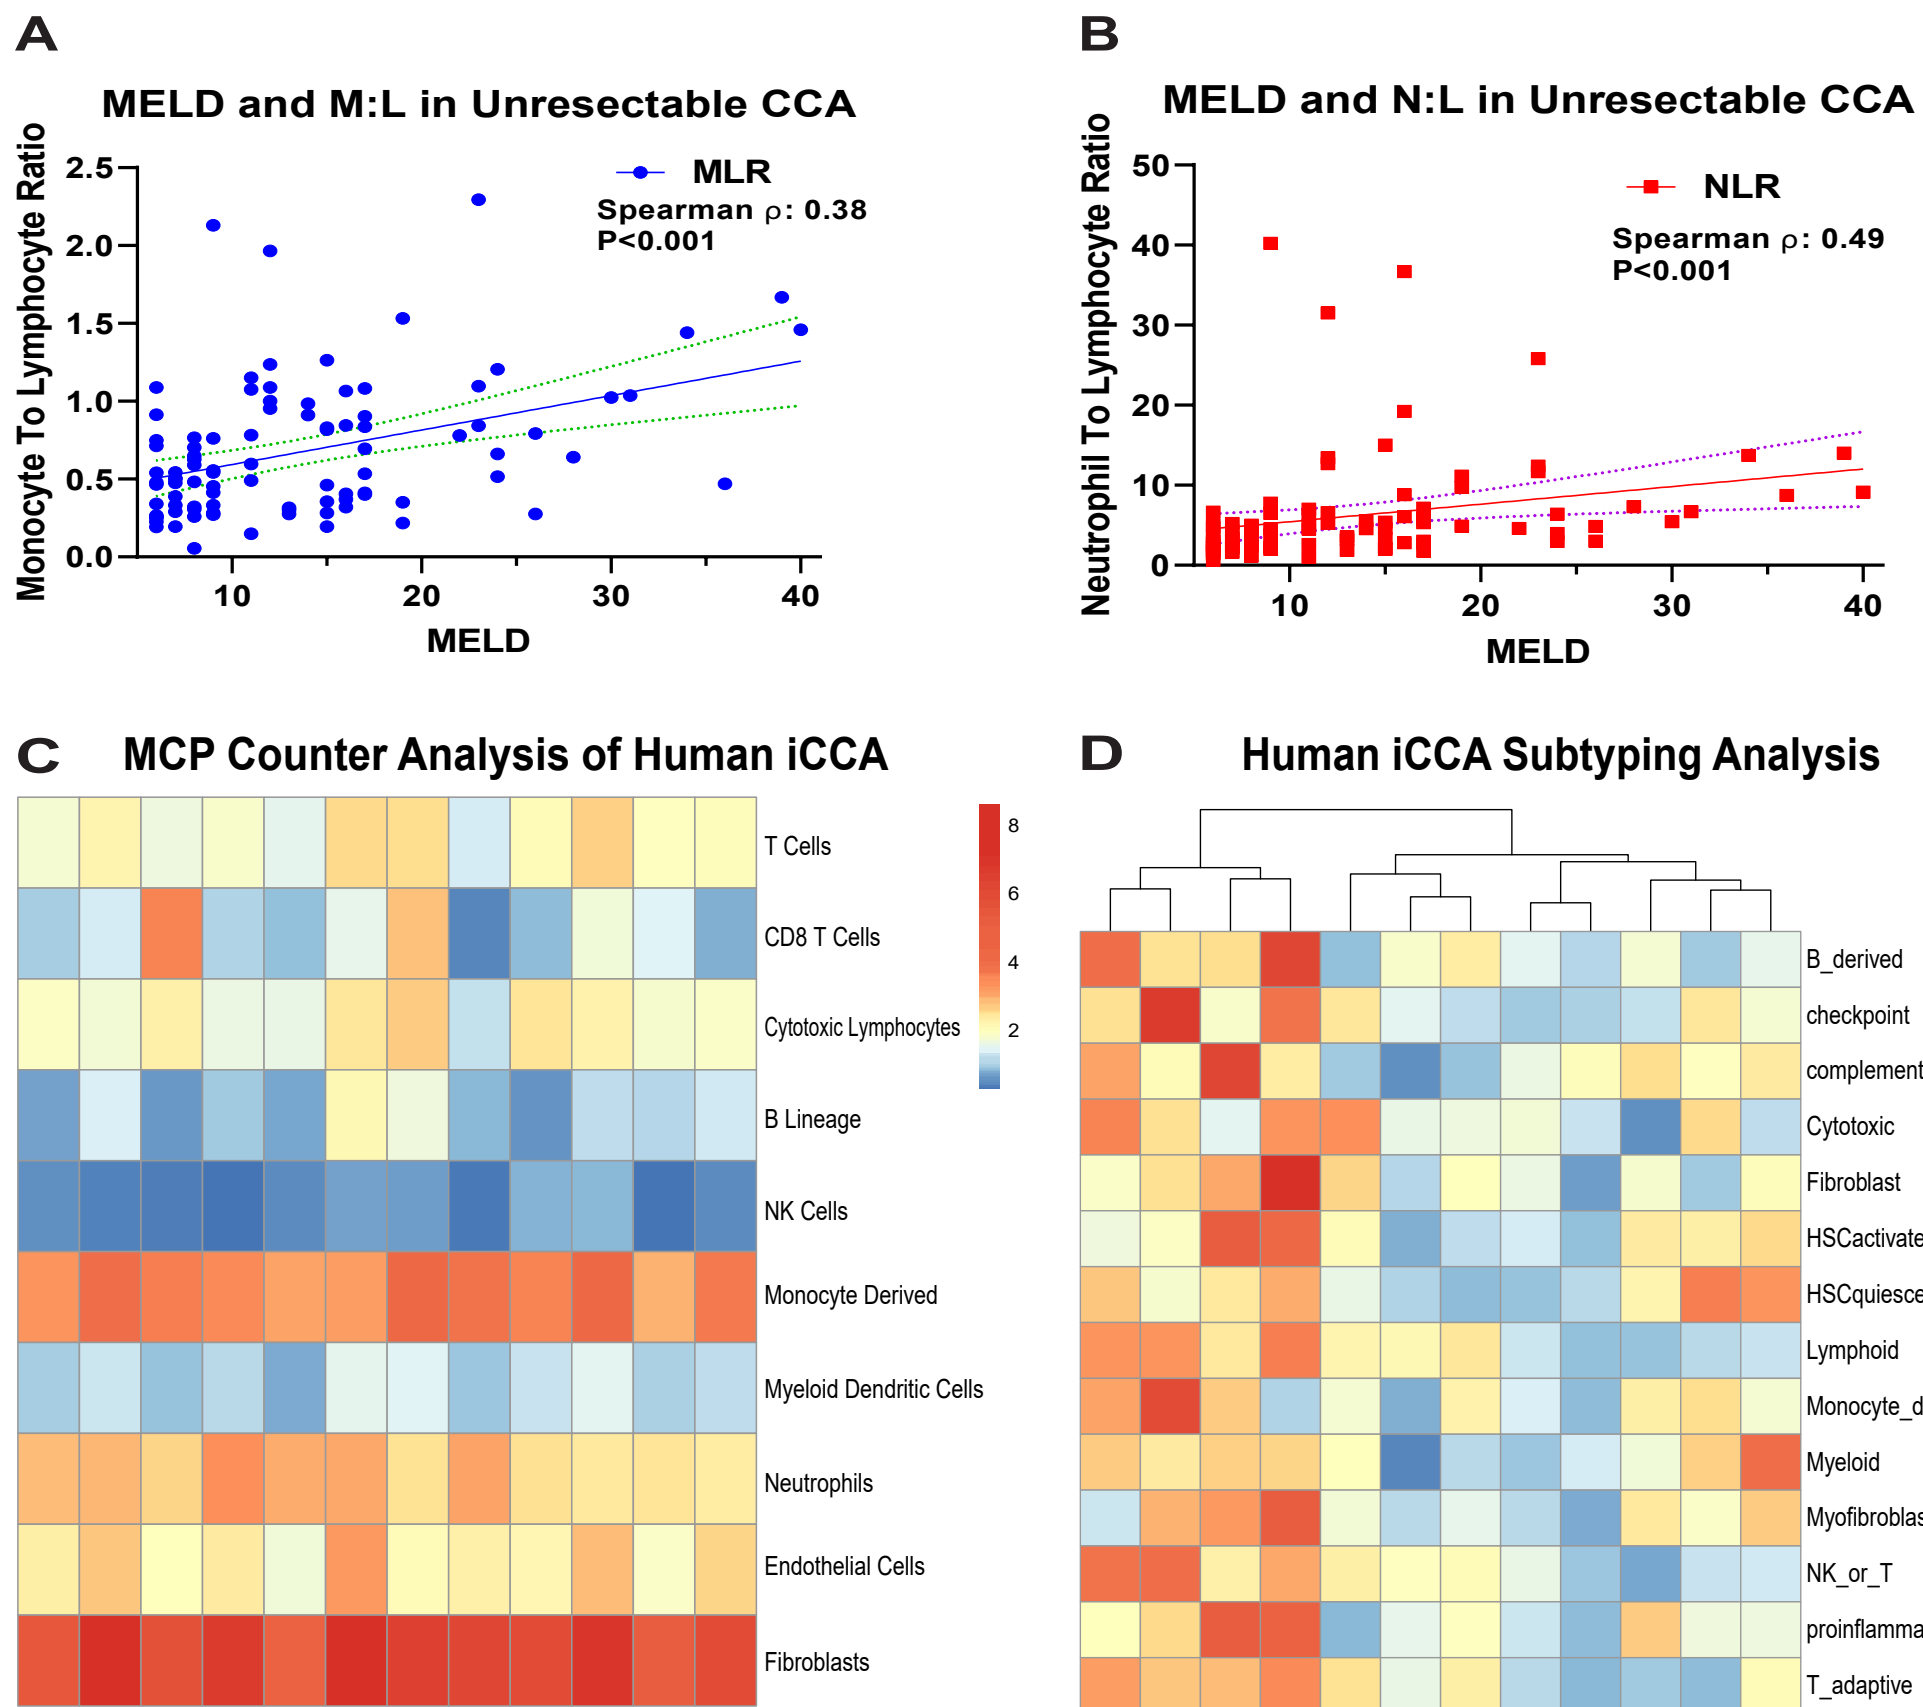



## Supplemental Figure 3

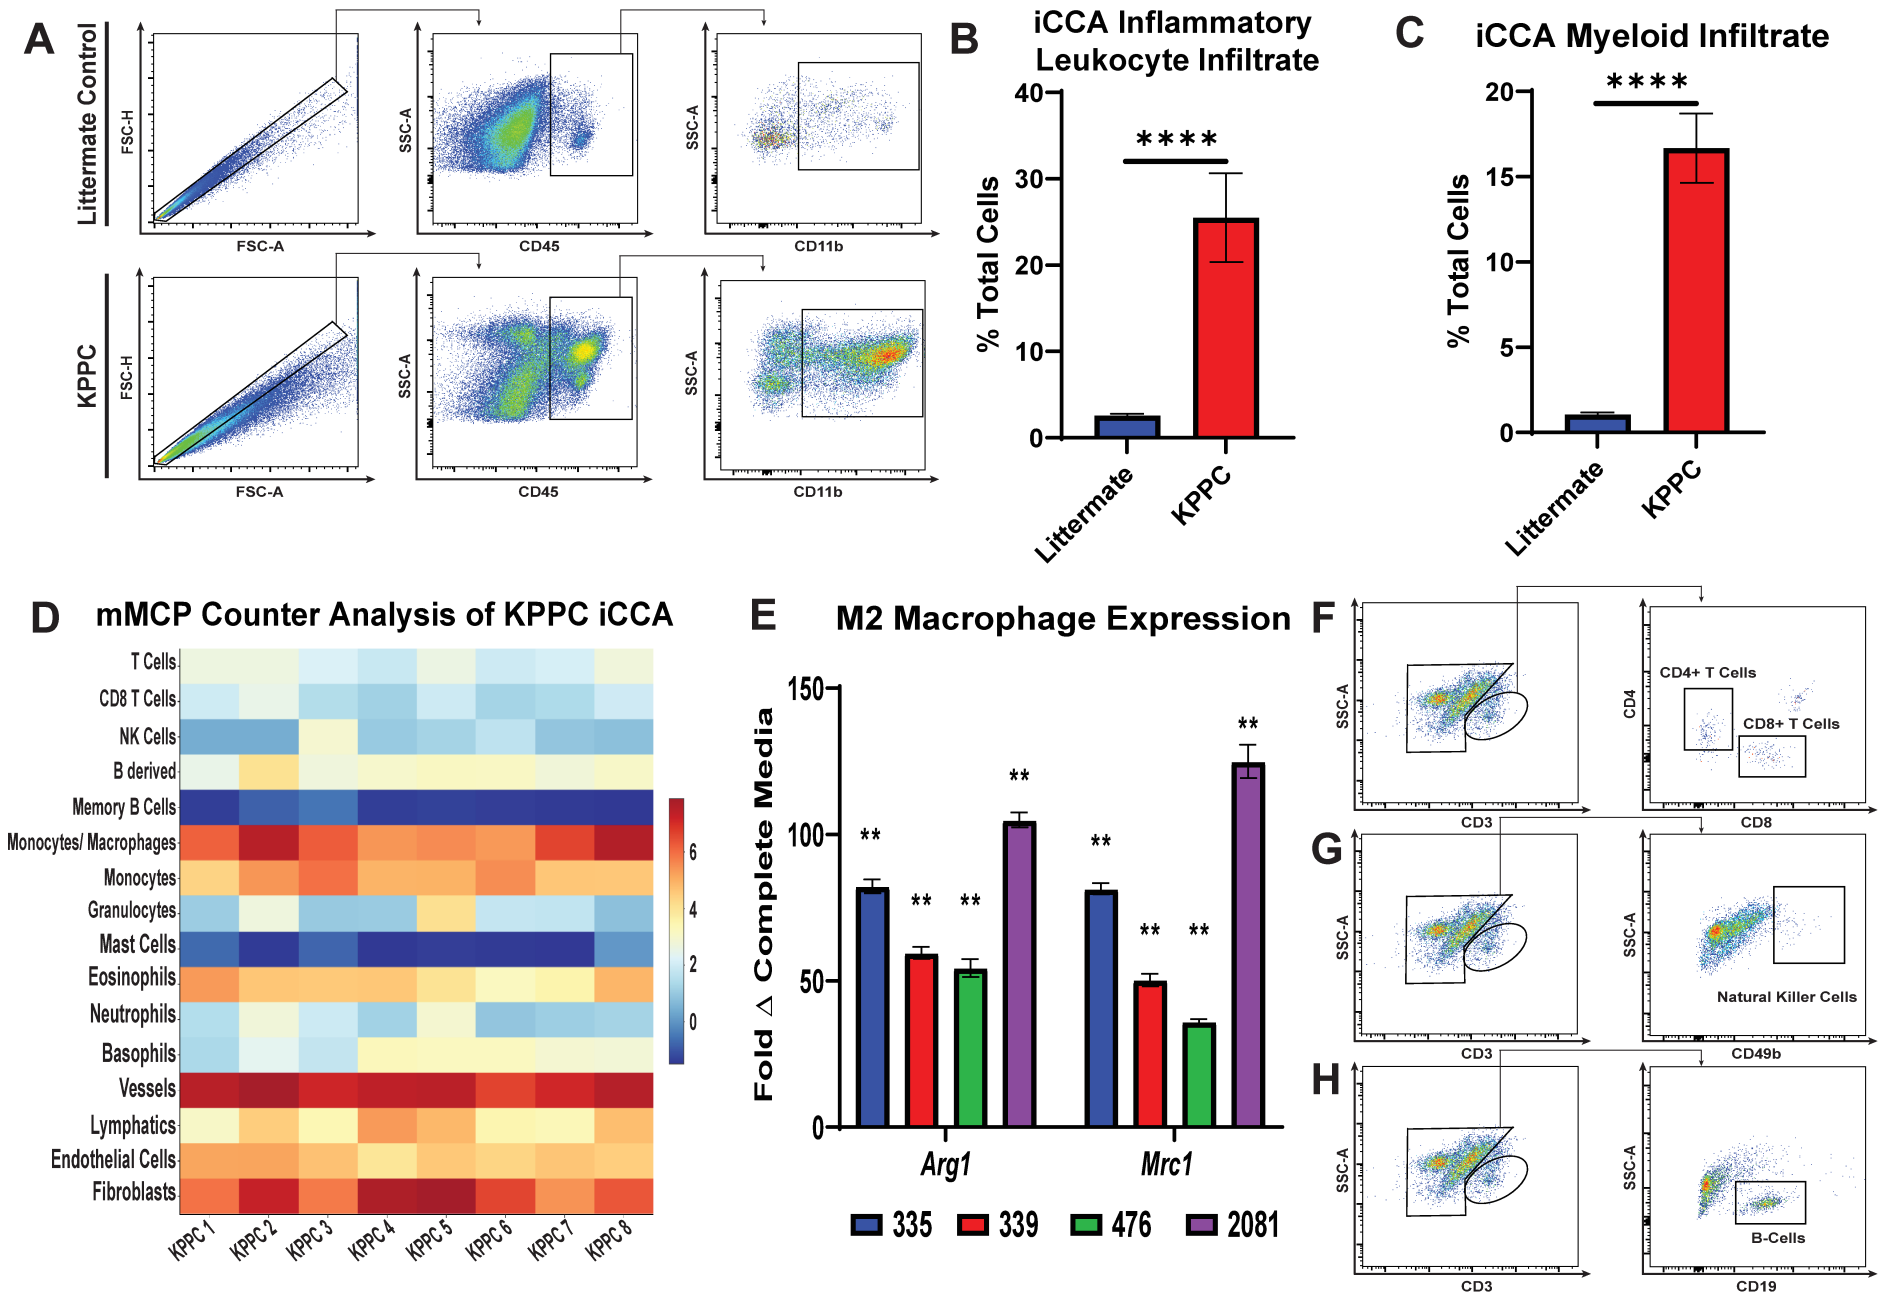

## Supplemental Figure 4

**A B-Mode Day 0**

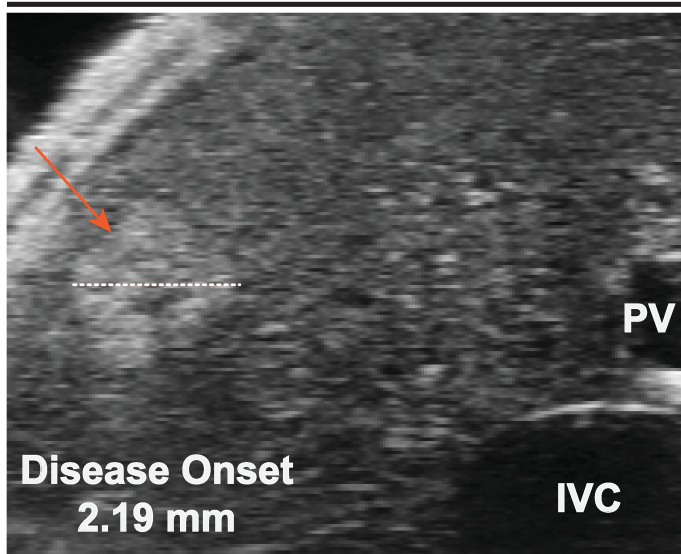

**B 2D Contour Tracing**

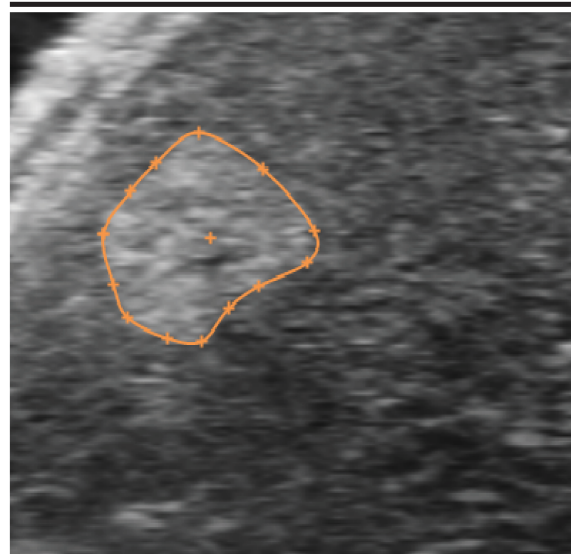

**C 3D Volume Day 0**

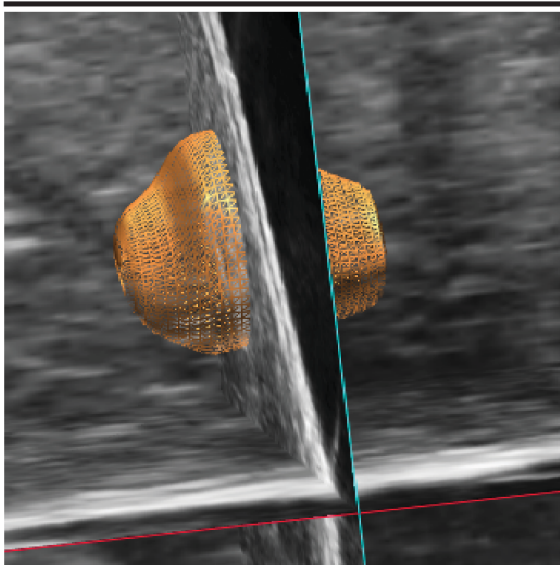

**D 3D Volume Day 27**

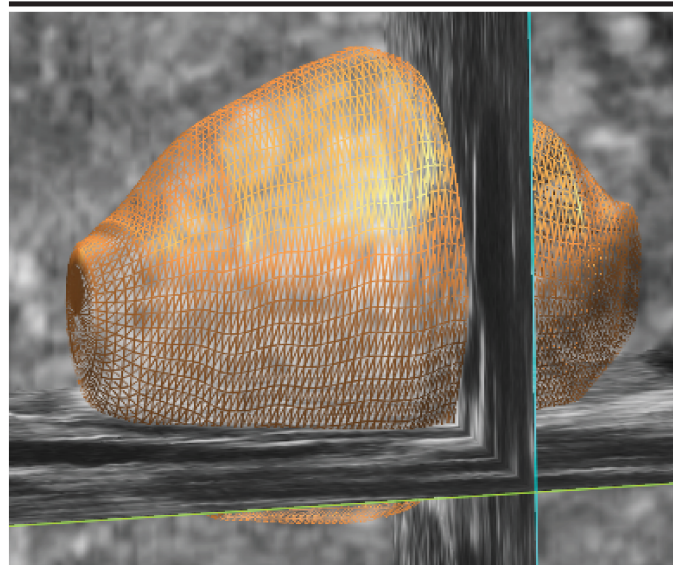



# Supplemental Figure 5

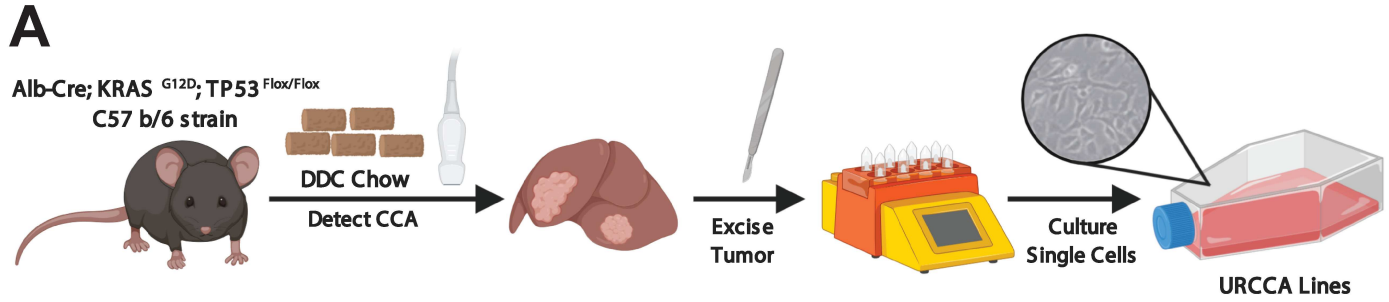

**B**

| Concentration (pg/mL) |  | Cell Line  | M-CSF | GM-CSF | G-CSF |
|-----------------------|--|------------|-------|--------|-------|
| ND                    |  | URCCA 1.1  |       |        |       |
| <5                    |  | URCCA 2.1  |       |        |       |
| 5-20                  |  | URCCA 2.2  |       |        |       |
| 20-41                 |  | URCCA 2.3  |       |        |       |
| 41-60                 |  | URCCA 2.6  |       |        |       |
| 61-100                |  | URCCA 3.1  |       |        |       |
| 101-150               |  | URCCA 3.2  |       |        |       |
| 151-250               |  | URCCA 3.3  |       |        |       |
| 251-500               |  | URCCA 3.4  |       |        |       |
|                       |  | URCCA 3.5  |       |        |       |
|                       |  | URCCA 4.1  |       |        |       |
|                       |  | URCCA 4.2  |       |        |       |
|                       |  | URCCA 4.3  |       |        |       |
|                       |  | KP2        |       |        |       |
|                       |  | Media Only |       |        |       |

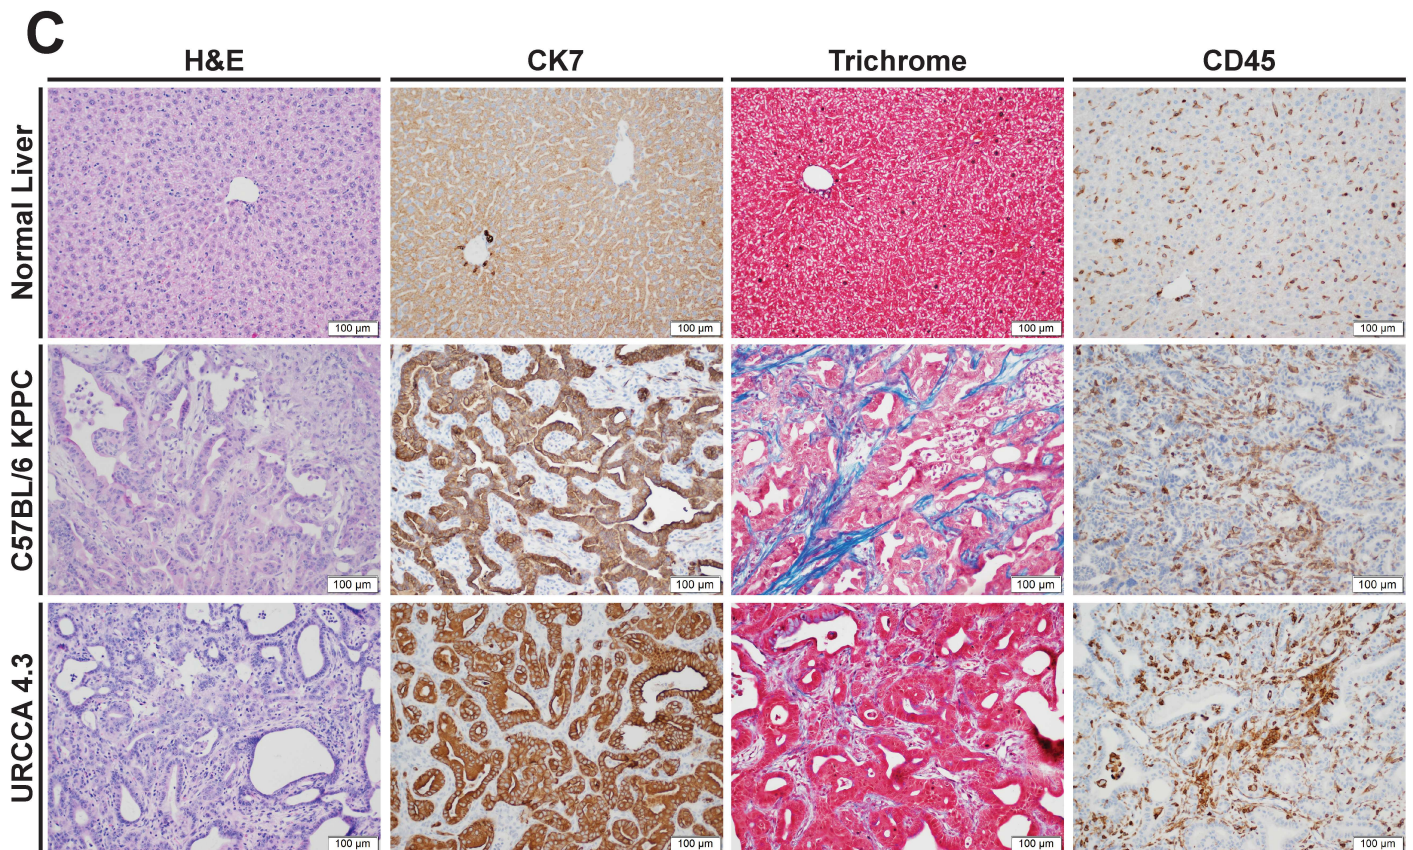

## Supplemental Figure 6

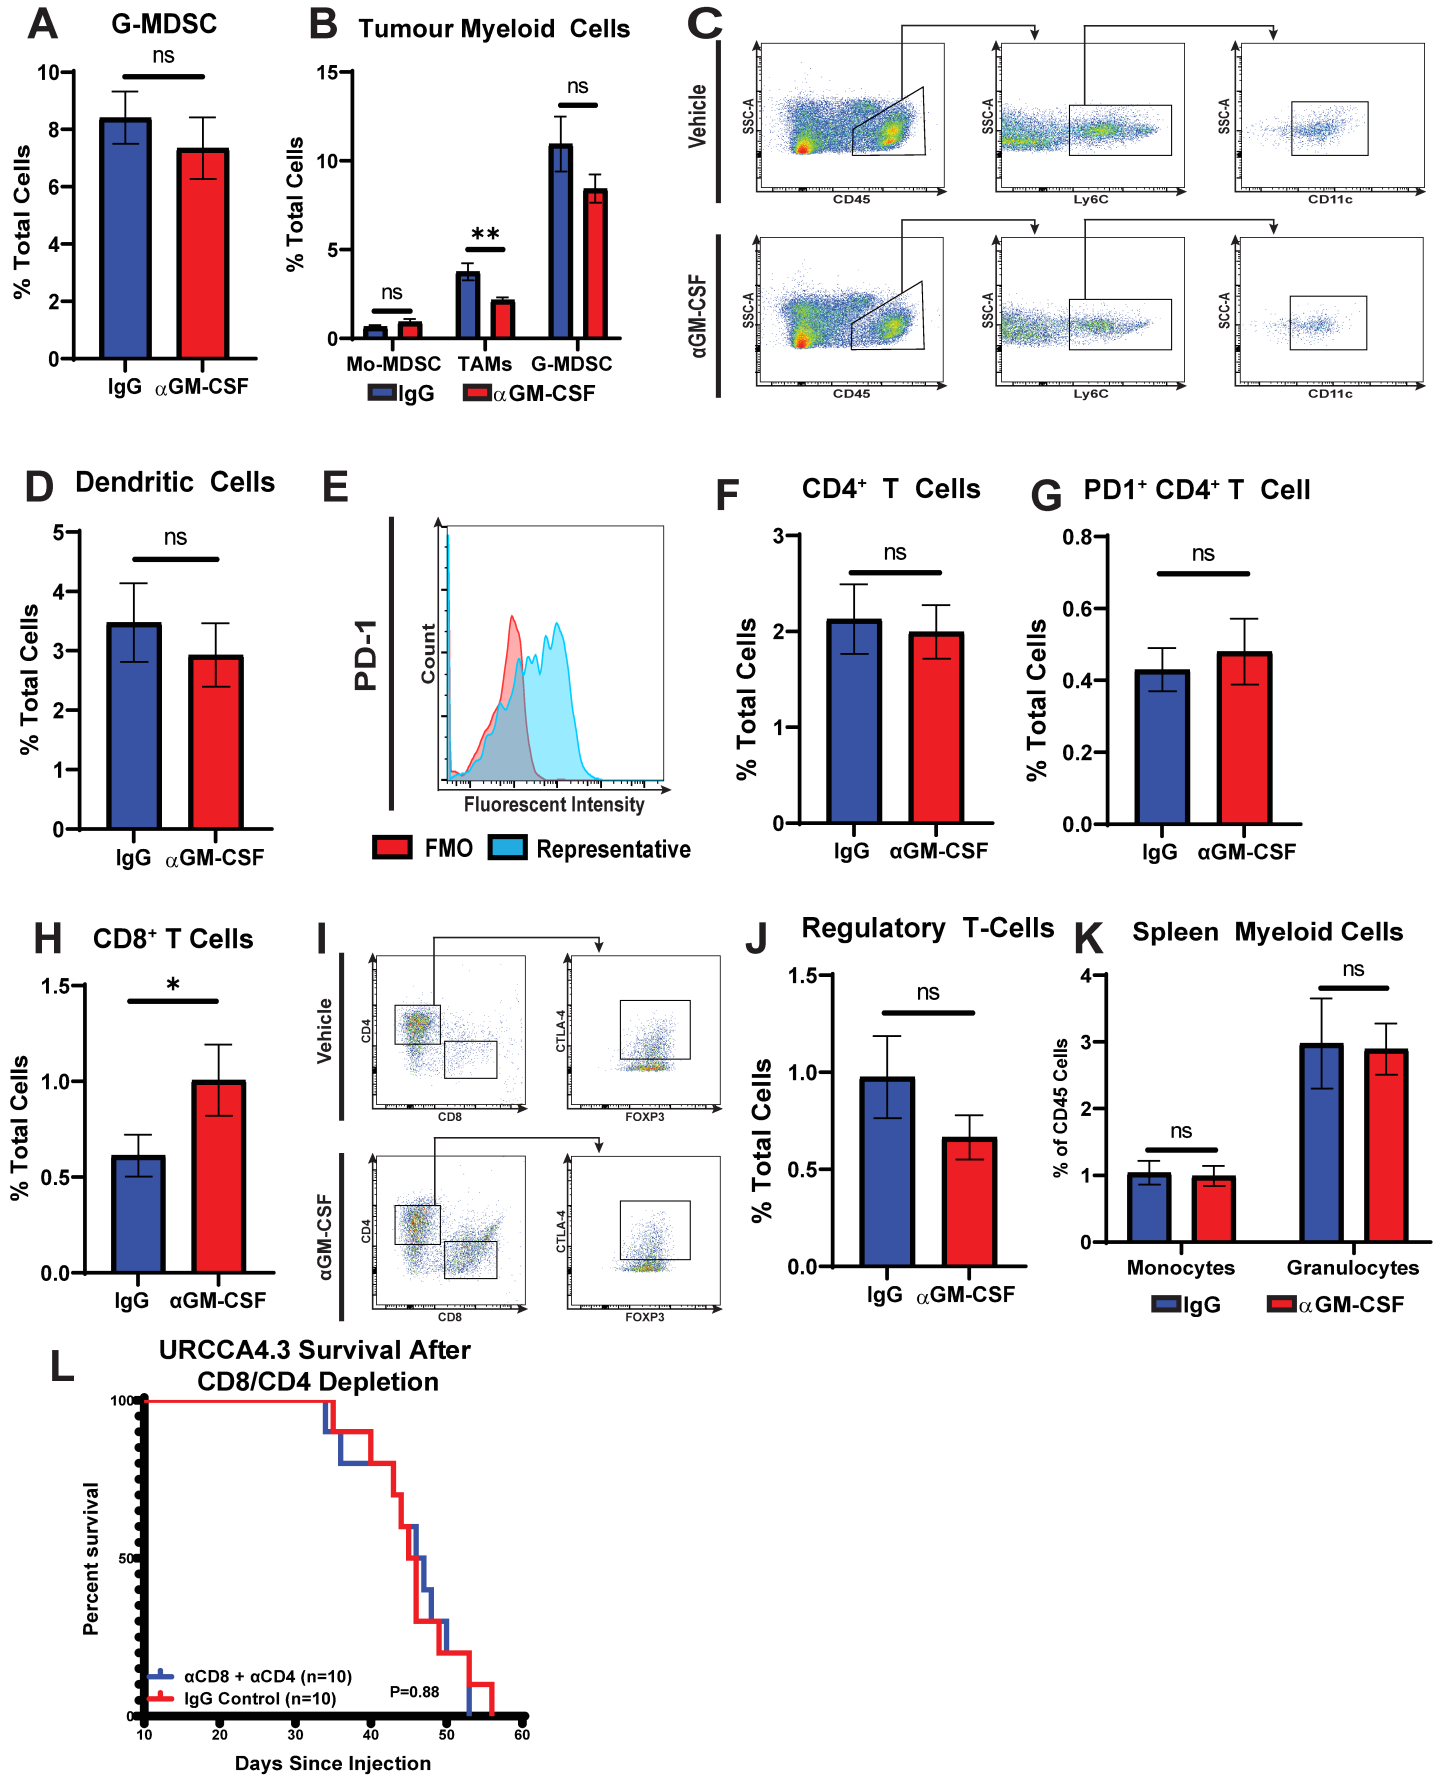

# Supplemental Figure 7

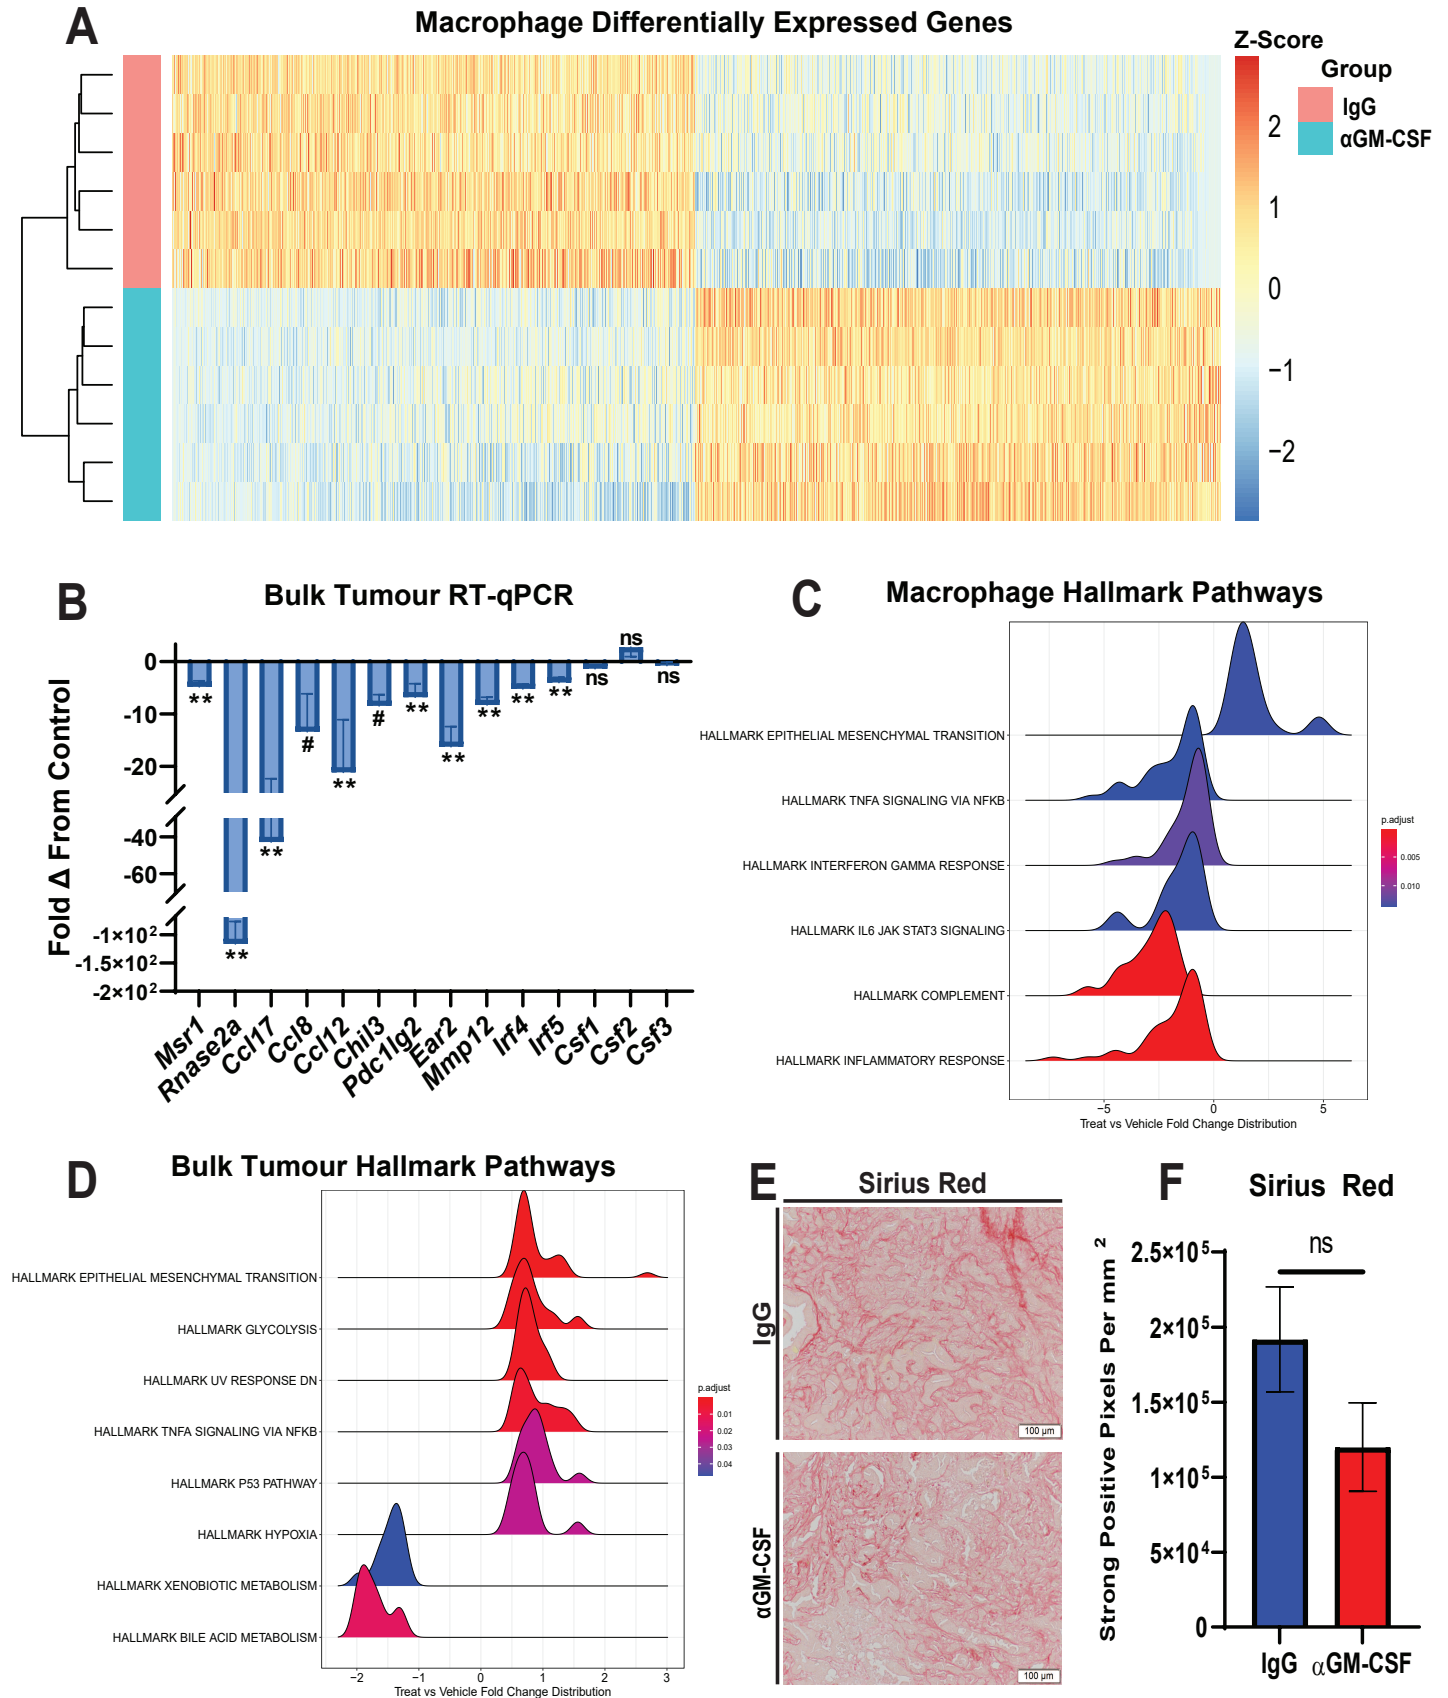

Supplement: gutjnl-2021-324109supp001_data_supplement.pdf [file gutjnl-2021-324109supp001_data_supplement.pdf]
